# Supplementary material for: Network-assisted genetic dissection of pathogenicity and drug resistance in the opportunistic human pathogenic fungus Cryptococcus neoformans
Source: PubMed Central journal article supplement (PMC4350084; doi:10.1038/srep08767), 2015-03-05
Supplement: srep08767-s1.pdf [file srep08767-s1.pdf]

## **Supplementary Materials and Methods**

### **Network-assisted genetic dissection of pathogenicity and drug resistance in the opportunistic human pathogenic fungus *Cryptococcus neoformans***

Hanhae Kim, Kwang-Woo Jung, Shinae Maeng, Ying-Lien Chen, Junha Shin, Jung Eun Shim, Sohyun Hwang, Guilhem Janbon, Taeyup Kim, Joseph Heitman, Yong-Sun Bahn, and Insuk Lee

#### **Contents**

- **Supplementary Figure S1**
- **Supplementary Figure S2**
- **Supplementary Figure S3**
- **Supplementary Table S1**
- **Supplementary Table S2**
- **Supplementary Table S3**
- **Supplementary Table S4**
- **Supplementary Table S5**
- **Supplementary Table S6**
- **Supplementary Table S7**
- **Supplementary Table S8**
- **Supplementary Table S9**
- **Supplementary Methods**
- **Supplemental References**

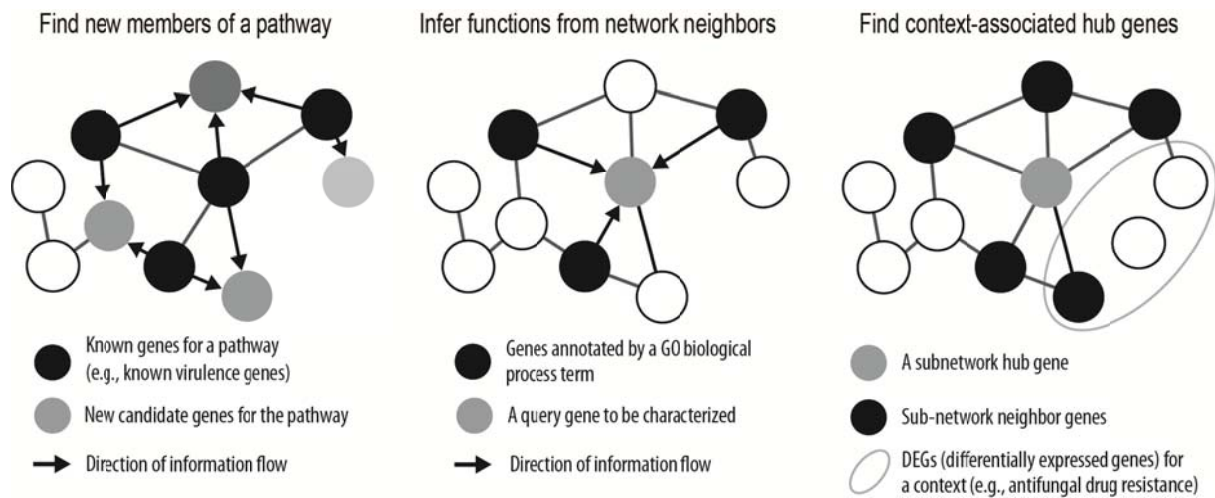

**Supplementary Figure S1. A schematic summary of network search options for hypothesis generation using CryptoNet** (A) ‘Find new members of a pathway’ search option is used to prioritize genes for pathways or phenotypes (gray node) such as virulence by propagating information of known genes (black node) through the network. Candidate genes are prioritized by sum of edge scores to known genes. Here, darker gray nodes represent more likely candidate genes. (B) ‘Infer functions from network neighbors’ search option is used to prioritize functions for a query gene (gray node). GO biological process annotations among neighbor genes are collected and algorithm rank them from the most enriched one. Here, an annotation term is most enriched among genes marked by black color. (C) ‘Find context associated hub genes’ search option is used to identify a sub-network hub gene (gray node) associated with a context of interest. This option is feasible to calculate significant overlap between submitted differentially expressed genes (DEGs, nodes in the larger circle) and neighbor genes of the sub-network hub gene (black node) by Fisher’s exact test. If a sub-network hub gene significantly possesses DEGs as its neighbor genes, the sub-network hub gene is defined as a context associated hub gene for the given context.

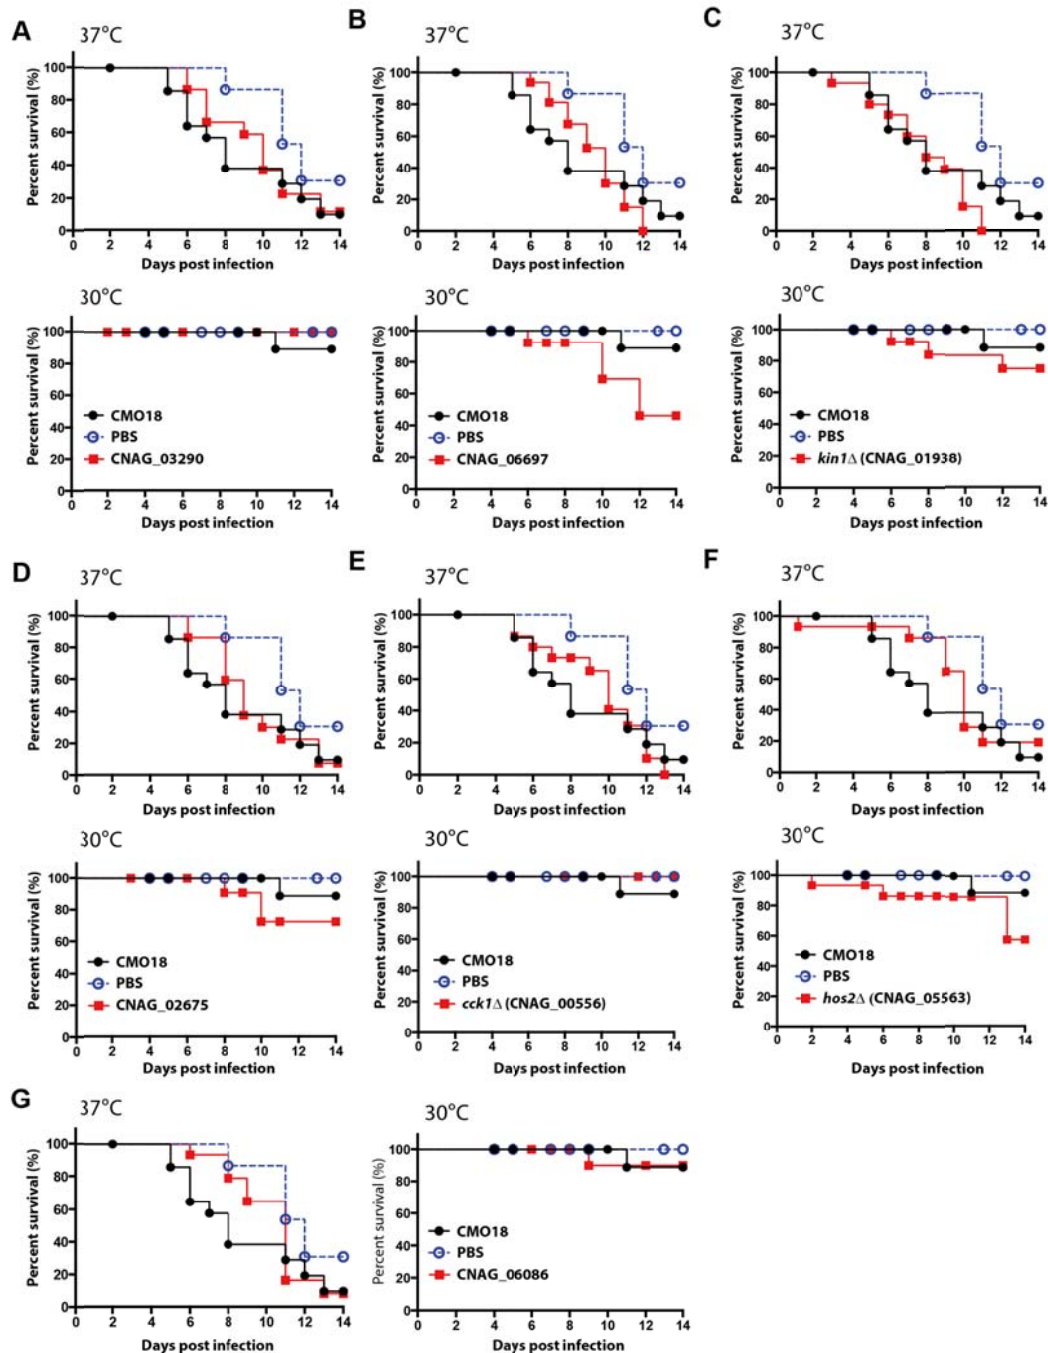

**Supplementary Figure S2. *in vivo* virulence assay of candidate genes by CryptoNet using a wax moth model system** Each larva was infected with 800,000 *Cryptococcus* cells and incubated at 30°C or 37°C. Percent survival (%) was monitored for 2 weeks post-infection. Percent survival (%) was monitored for 2 weeks post-infection.  $P=0.3755$  and  $P=0.3458$  for CMO18 vs. CNAG\_03290 at 37°C or 30°C,  $P=0.2206$  and  $P=0.0772$  for CMO18 vs. CNAG\_06697 at 37°C or 30°C,  $P=0.7671$  and  $P=0.3040$  for CMO18 vs. *kin1*Δ (CNAG\_01938) mutant at 37°C or 30°C,  $P=0.2159$  and  $P=0.2033$  for CMO18 vs. CNAG\_02675 at 37°C or 30°C,  $P=0.4473$  and  $P=0.3173$  for CMO18 vs. *cck1*Δ (CNAG\_00556) mutant at 37°C or 30°C,  $P=0.2113$  and  $P=0.1461$  for CMO18 vs. *hos2*Δ (CNAG\_05563) mutant at 37°C or 30°C,  $P=0.0905$  and  $P=0.5858$  for CMO18 vs. CNAG\_06086 at 37°C or 30°C, respectively.

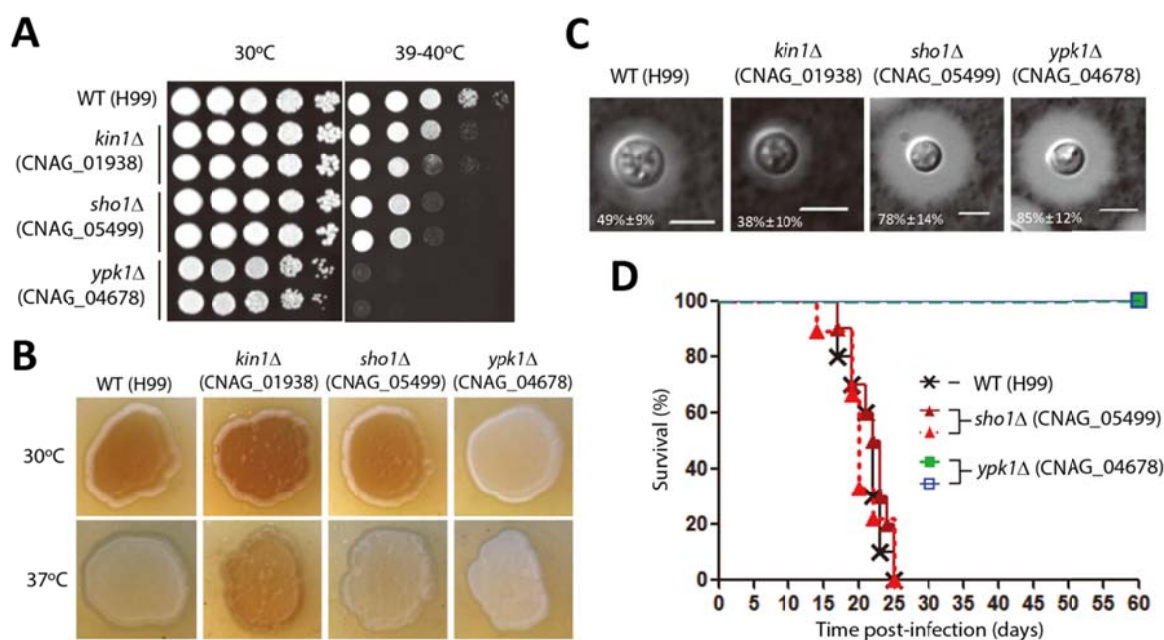

**Supplementary Figure S3. Experimental validations for Kin1, Ypk1, and Sho1 that were predicted by CryptoNet to be involved in virulence regulation in *C. neoformans*** (A) For thermotolerance test, each strain grown overnight was 10-fold serially diluted (1 to  $10^4$ ), spotted on YPD medium, and further incubated at 30°C, or 39°C for 2-4 days. (B) Each *C. neoformans* strain was spotted on Niger seed medium containing the indicated concentration of glucose (0.5%) and incubated at 30°C or 37°C. The images were photographed by using a microscope (Motic Microscope) equipped with a digital camera (Pro-Microscan No. 5888). (C) For capsule production measurement, each strain was spotted and cultured on DME agar medium at 30°C for 2 days. Capsules were visualized by India ink staining. Relative capsule diameter was described in the picture. The scale bar represents 10 μm. The images were photographed by using a SPOT insight digital camera (Diagnostic Instrument Inc.) (D) A/Jer mice were infected with  $10^5$  cells of WT and two independent mutants by intranasal instillation. Survival (%) was monitored daily for 60 days after infection. Strains were: WT (H99), *kin1*Δ mutants (YSB1716 and YSB1718), *sho1*Δ mutants (YSB1719 and YSB1720) and *ypk1*Δ mutants (YSB1735 and YSB1736).

**Supplementary Table S1. Fourteen distinct data types incorporated into the CryptoNet**

| <b>Evidence code</b> | <b>Evidence description</b>                                                                                                          | <b># unique genes</b> | <b># unique gene pairs</b> |
|----------------------|--------------------------------------------------------------------------------------------------------------------------------------|-----------------------|----------------------------|
| CN-CC                | Inferred links by co-citation of two genes across full texts of 609 PubMed central (PMC) articles for <i>C. neoformans</i> biology   | 1066                  | 23217                      |
| CN-CX                | Inferred links by co-expression pattern of two <i>C. neoformans</i> genes across gene expression profiles obtained from GEO database | 5699                  | 288517                     |
| CN-DC                | Inferred links by co-occurrence of protein domains between two <i>C. neoformans</i> coding genes                                     | 2844                  | 7437                       |
| CN-GN                | Inferred links by similar genomic context of bacterial orthologs of two <i>C. neoformans</i> genes                                   | 2386                  | 36495                      |
| CN-PG                | Inferred links by similar phylogenetic profiles between two <i>C. neoformans</i> genes                                               | 1458                  | 36514                      |
| HS-HT                | Associalogs of high-throughput human protein-protein interactions                                                                    | 1079                  | 5379                       |
| HS-LC                | Associalogs of small/medium-scale human protein-protein interactions (collected from protein-protein interaction data bases)         | 1473                  | 14619                      |
| SC-CC                | Associalogs of yeast gene links by co-citation of two yeast genes across 46,111 PubMed Medline articles for yeast biology            | 2254                  | 28539                      |
| SC-CX                | Associalogs of yeast gene links by co-expression pattern                                                                             | 2613                  | 170489                     |
| SC-DC                | Associalogs of yeast gene links by co-occurrence of protein domains between two yeast coding genes                                   | 1561                  | 6731                       |
| SC-GT                | Associalogs of yeast gene links by similar profiles of yeast genetic interaction context                                             | 1960                  | 4089                       |
| SC-HT                | Associalogs of high-throughput yeast protein-protein interactions                                                                    | 2543                  | 64617                      |
| SC-LC                | Associalogs of small/medium-scale yeast protein-protein interactions (collected from protein-protein interaction data bases)         | 2527                  | 25928                      |
| SC-TS                | Associalogs of protein interactions from yeast tertiary structures of complexes                                                      | 593                   | 1395                       |
| CryptoNet            | A integrated gene network for <i>C. neoformans</i>                                                                                   | 5649                  | 156506                     |

**Supplementary Table S2. 73 *Cryptococcus neoformans* genes for three different virulence phenotypes collected from literature**

| Category | H99 locus ID | Gene name     | Reference                                   |
|----------|--------------|---------------|---------------------------------------------|
| Capsule  | CNAG_00769   | <i>PBS2</i>   | Mol Biol Cell. 2005 May;16(5):2285-300.     |
| Capsule  | CNAG_03202   | <i>CAC1</i>   | Eukaryot Cell. 2002 Feb;1(1):75-84.         |
| Capsule  | CNAG_03818   | <i>SSK1</i>   | Mol Biol Cell. 2006 Jul;17(7):3122-35.      |
| Capsule  | CNAG_00570   | <i>PKR1</i>   | Mol Cell Biol. 2001 May;21(9):3179-91.      |
| Capsule  | CNAG_05431   | <i>RIM101</i> | PLoS Pathog. 2010 Feb 19;6(2):e1000776.     |
| Capsule  | CNAG_01626   | <i>ADA2</i>   | PLoS Pathog. 2011 Dec;7(12):e1002411        |
| Capsule  | CNAG_02885   | <i>CAP64</i>  | Infect Immun. 1996 Jun;64(6):1977-83        |
| Capsule  | CNAG_00721   | <i>CAP59</i>  | Mol Cell Biol. 1994 Jul;14(7):4912-9        |
| Capsule  | CNAG_04090   | <i>ATF1</i>   | Genetics. 2010 Aug;185(4):1207-19.          |
| Capsule  | CNAG_05063   | <i>SSK2</i>   | Eukaryot Cell. 2007 Dec;6(12):2278-89.      |
| Capsule  | CNAG_04864   | <i>CIR1</i>   | PLoS Biol. 2006 Nov;4(12):e410.             |
| Capsule  | CNAG_01845   | <i>PKC1</i>   | Eukaryot Cell. 2008 Oct;7(10):1685-98.      |
| Capsule  | CNAG_04505   | <i>GPA1</i>   | Eukaryot Cell. 2004 Dec;3(6):1476-91.       |
| Capsule  | CNAG_05465   | <i>GIB2</i>   | J Biol Chem. 2006 Oct 27;281(43):32596-605. |
| Capsule  | CNAG_06301   | <i>SCH9</i>   | Curr Genet. 2004 Nov;46(5):247-55.          |
| Capsule  | CNAG_05817   | <i>GMT1</i>   | Eukaryot Cell. 2007 May;6(5):776-85.        |
| Capsule  | CNAG_03670   | <i>IRE1</i>   | PLoS Pathog. 2011 Aug;7(8):e1002177         |
| Capsule  | CNAG_07554   | <i>CAP10</i>  | J Bacteriol. 1999 Sep;181(18):5636-43.      |
| Capsule  | CNAG_02702   | <i>CLC-A</i>  | Mol Microbiol. 2003 Nov;50(4):1271-81.      |
| Capsule  | CNAG_05218   | <i>ACA1</i>   | Eukaryot Cell. 2004 Dec;3(6):1476-91        |
| Capsule  | CNAG_00600   | <i>CAP60</i>  | Infect Immun. 1998 May;66(5):2230-6         |
| Capsule  | CNAG_01523   | <i>HOG1</i>   | Mol Biol Cell. 2005 May;16(5):2285-300.     |
| Capsule  | CNAG_04969   | <i>UGD1</i>   | Eukaryot Cell. 2004 Dec;3(6):1601-8.        |
| Capsule  | CNAG_02008   | <i>OVA1</i>   | PLoS Pathog. 2007 Mar;3(3):e42.             |
| Capsule  | CNAG_07470   | <i>PDE2</i>   | Eukaryot Cell, Dec. 2005, 4(12) 1971–1981   |
| Capsule  | CNAG_01106   | <i>VPH1</i>   | Mol Microbiol. 2001 Nov;42(4):1121-31.      |
| Capsule  | CNAG_05081   | <i>PDE1</i>   | Eukaryot Cell, Dec. 2005, 4(12) 1971–1981   |
| Capsule  | CNAG_00396   | <i>PKA1</i>   | Mol Cell Biol. 2001 May;21(9):3179-91       |

|                 |            |              |                                               |
|-----------------|------------|--------------|-----------------------------------------------|
| Melanin         | CNAG_06552 | <i>SNF1</i>  | Fungal Genet Biol. 2010 Dec; 47(12):994-1000. |
| Melanin         | CNAG_00996 | <i>PMT4</i>  | PLoS One. 2009 Jul 27;4(7):e6321.             |
| Melanin         | CNAG_00815 | <i>SIT1</i>  | Microbiology. 2007 Jan;153(Pt 1):29-41.       |
| Melanin         | CNAG_04215 | <i>MET3</i>  | Microbiology. 2002 Aug;148(Pt 8):2617-25.     |
| Melanin         | CNAG_00130 | <i>HRK1</i>  | PLoS ONE 6(4): e18769                         |
| Melanin         | CNAG_00769 | <i>PBS2</i>  | Mol Biol Cell. 2005 May;16(5):2285-300.       |
| Melanin         | CNAG_03409 | <i>SKN7</i>  | Mol Biol Cell. 2006 Jul;17(7):3122-35.        |
| Melanin         | CNAG_05218 | <i>ACA1</i>  | Eukaryot Cell. 2004 Dec;3(6):1476-91          |
| Melanin         | CNAG_04090 | <i>ATF1</i>  | Genetics. 2010 Aug;185(4):1207-19.            |
| Melanin         | CNAG_01523 | <i>HOG1</i>  | Mol Biol Cell. 2005 May;16(5):2285-300.       |
| Melanin         | CNAG_02357 | <i>MKK2</i>  | Mol Microbiol. 2005 Oct;58(2):393-408.        |
| Melanin         | CNAG_05081 | <i>PDE1</i>  | Eukaryot Cell, Dec. 2005, 4(12) 1971-1981     |
| Melanin         | CNAG_04505 | <i>GPA1</i>  | Eukaryot Cell. 2004 Dec;3(6):1476-91.         |
| Melanin         | CNAG_03202 | <i>CAC1</i>  | Eukaryot Cell. 2002 Feb;1(1):75-84.           |
| Melanin         | CNAG_02867 | <i>PLC1</i>  | Mol Microbiol. 2008 Aug;69(4):809-26.         |
| Melanin         | CNAG_03818 | <i>SSK1</i>  | Mol Biol Cell. 2006 Jul;17(7):3122-35.        |
| Melanin         | CNAG_07470 | <i>PDE2</i>  | Eukaryot Cell, Dec. 2005, 4(12) 1971-1981     |
| Melanin         | CNAG_00396 | <i>PKA1</i>  | Mol Cell Biol. 2001 May;21(9):3179-91         |
| Melanin         | CNAG_04864 | <i>CIR1</i>  | PLoS Biol. 2006 Nov;4(12):e410.               |
| Melanin         | CNAG_01845 | <i>PKC1</i>  | Mol Microbiol. 2005 Oct;58(2):393-408.        |
| Melanin         | CNAG_03465 | <i>LAC1</i>  | J. Exp. Med. 1996 184:377-386.                |
| Melanin         | CNAG_03464 | <i>LAC2</i>  | Eukaryot Cell 2005 4(1) 190-201               |
| Melanin         | CNAG_05063 | <i>SSK2</i>  | Eukaryot Cell. 2007 Dec;6(12):2278-89.        |
| Thermotolerance | CNAG_02357 | <i>MKK2</i>  | Mol Microbiol. 2005 Oct;58(2):393-408.        |
| Thermotolerance | CNAG_01523 | <i>HOG1</i>  | Mol Biol Cell. 2005 May;16(5):2285-300.       |
| Thermotolerance | CNAG_01845 | <i>PCK1</i>  | Mol Microbiol. 2005 Oct;58(2):393-408.        |
| Thermotolerance | CNAG_01626 | <i>ADA2</i>  | PLoS Pathog. 2011 Dec;7(12):e1002411          |
| Thermotolerance | CNAG_00375 | <i>GCN5</i>  | Eukaryot Cell. 2010 Aug;9(8):1193-202.        |
| Thermotolerance | CNAG_06134 | <i>HXL1</i>  | PLoS Pathog. 2011 Aug;7(8):e1002177           |
| Thermotolerance | CNAG_05348 | <i>CDC42</i> | Mol Microbiol. 2010 Feb;75(3):763-80          |
| Thermotolerance | CNAG_04388 | <i>SOD2</i>  | Eukaryot Cell. 2005 Jan;4(1):46-54.           |

|                 |            |               |                                           |
|-----------------|------------|---------------|-------------------------------------------|
| Thermotolerance | CNAG_03818 | <i>SSK1</i>   | Mol Biol Cell. 2006 Jul;17(7):3122-35.    |
| Thermotolerance | CNAG_06301 | <i>SCH9</i>   | Curr Genet 2004.Nov 46(5):247-255         |
| Thermotolerance | CNAG_01530 | <i>MGA2</i>   | Eukaryot Cell. 2004 Oct;3(5):1249-60.     |
| Thermotolerance | CNAG_04864 | <i>CIR1</i>   | PLoS Biol. 2006 Nov;4(12):e410.           |
| Thermotolerance | CNAG_04969 | <i>UGD1</i>   | J Biol Chem. 2004 Dec 3;279(49):51669-76. |
| Thermotolerance | CNAG_04755 | <i>BCK1</i>   | Mol Microbiol. 2005 Oct;58(2):393-408.    |
| Thermotolerance | CNAG_05063 | <i>SSK2</i>   | Eukaryot Cell. 2007 Dec;6(12):2278-89.    |
| Thermotolerance | CNAG_00769 | <i>PBS2</i>   | Mol Biol Cell. 2005 May;16(5):2285-300.   |
| Thermotolerance | CNAG_00293 | <i>RAS1</i>   | Eukaryot Cell. 2010 Mar;9(3):360-78.      |
| Thermotolerance | CNAG_05968 | <i>CDC420</i> | Mol Microbiol. 2010 Feb;75(3):763-80.     |
| Thermotolerance | CNAG_03670 | <i>IRE1</i>   | PLoS Pathog. 2011 Aug;7(8):e1002177       |
| Thermotolerance | CNAG_00815 | <i>SIT1</i>   | Microbiology. 2007 Jan;153(Pt 1):29-41.   |
| Thermotolerance | CNAG_04514 | <i>MPK1</i>   | Mol Microbiol. 2003 Jun;48(5):1377-87     |
| Thermotolerance | CNAG_02867 | <i>PLC1</i>   | Mol Microbiol. 2008 Aug;69(4):809-26.     |



**Supplementary Table S3. Predicted top 100 candidate for three virulence factors by guilt-by association (√: tested strain)**

**Capsule formation**

| Rank | CNAG_ID    | name         | Sc ortholog  | Score | This study (phenotype) | Madhani's study (phenotype) |
|------|------------|--------------|--------------|-------|------------------------|-----------------------------|
| 1    | CNAG_04755 | <i>BCK1</i>  | <i>BCK1</i>  | 27.86 |                        |                             |
| 2    | CNAG_04514 | <i>MPK1</i>  | <i>SLT2</i>  | 26.66 | √ (WT-level)           | √ (WT-level)                |
| 3    | CNAG_00293 | <i>RAS1</i>  | <i>RAS2</i>  | 24.77 |                        |                             |
| 4    | CNAG_01664 |              | <i>CDC28</i> | 24.09 |                        |                             |
| 5    | CNAG_02357 | <i>MKK2</i>  | <i>MKK2</i>  | 20.88 |                        |                             |
| 6    | CNAG_05970 |              | <i>STE20</i> | 20    |                        |                             |
| 7    | CNAG_00745 |              | <i>NPR1</i>  | 19.96 | √ (WT-level)           | √ (WT-level)                |
| 8    | CNAG_04148 |              | <i>KIN3</i>  | 19.89 |                        |                             |
| 9    | CNAG_06552 | <i>SNF1</i>  | <i>SNF1</i>  | 19.85 | √ (WT-level)           | √ (WT-level)                |
| 10   | CNAG_00683 |              | <i>KNS1</i>  | 19.81 |                        |                             |
| 11   | CNAG_04678 | <i>YPK1</i>  | <i>YPK1</i>  | 19.7  |                        |                             |
| 12   | CNAG_02194 |              | <i>DBF20</i> | 19.66 |                        |                             |
| 13   | CNAG_06730 | <i>GSK3</i>  | <i>RIM11</i> | 19.52 |                        | √ (Enhanced)                |
| 14   | CNAG_01730 | <i>STE7</i>  | <i>STE7</i>  | 19.46 | √ (WT-level)           | √ (WT-level)                |
| 15   | CNAG_02531 | <i>CPK2</i>  | <i>FUS3</i>  | 19.44 | √ (WT-level)           | √ (WT-level)                |
| 16   | CNAG_07675 |              | <i>IRA2</i>  | 19.36 |                        |                             |
| 17   | CNAG_02511 | <i>CPK1</i>  |              | 19    | √ (WT-level)           | √ (WT-level)                |
| 18   | CNAG_06568 |              | <i>SKS1</i>  | 18.92 | √ (WT-level)           | √ (WT-level)                |
| 19   | CNAG_00130 | <i>HRK1</i>  | <i>RCK2</i>  | 18.87 | √ (WT-level)           | √ (WT-level)                |
| 20   | CNAG_03567 | <i>CBK1</i>  | <i>CBK1</i>  | 18.43 |                        |                             |
| 21   | CNAG_04040 |              | <i>FPK1</i>  | 18.38 | √ (WT-level)           | √ (WT-level)                |
| 22   | CNAG_08022 |              | <i>PHO85</i> | 18.23 |                        |                             |
| 23   | CNAG_06980 | <i>STE11</i> | <i>STE11</i> | 17.79 |                        |                             |
| 24   | CNAG_04162 | <i>PKA2</i>  |              | 17.55 | √ (WT-level)           | √ (WT-level)                |
| 25   | CNAG_01285 |              | <i>IPL1</i>  | 17.36 |                        |                             |

|    |            |                |                |       |              |              |
|----|------------|----------------|----------------|-------|--------------|--------------|
| 26 | CNAG_00405 | <i>KIC1</i>    | <i>KIC1</i>    | 17.33 |              |              |
| 27 | CNAG_07427 | <i>CCK2</i>    | <i>HRR25</i>   | 17.29 |              |              |
| 28 | CNAG_06086 |                | <i>SSN3</i>    | 17.22 | √ (Enhanced) | √ (WT-level) |
| 29 | CNAG_03167 |                | <i>CHK1</i>    | 17.22 |              |              |
| 30 | CNAG_07942 |                | <i>CDC25</i>   | 17.18 |              |              |
| 31 | CNAG_03811 |                |                | 17.14 | √ (Enhanced) | √ (Enhanced) |
| 32 | CNAG_02915 | <i>PDK1</i>    | <i>PKH2</i>    | 17.13 | √ (WT-level) | √ (WT-level) |
| 33 | CNAG_01938 | <i>KIN1</i>    | <i>KIN1</i>    | 17.1  | √ (Enhanced) | √ (WT-level) |
| 34 | CNAG_05439 |                | <i>CMK2</i>    | 17    | √ (WT-level) | √ (WT-level) |
| 35 | CNAG_06445 |                | <i>KIN28</i>   | 16.94 |              |              |
| 36 | CNAG_05216 |                | <i>RAD53</i>   | 16.55 | √ (WT-level) | √ (WT-level) |
| 37 | CNAG_03290 |                | <i>SPS1</i>    | 16.51 | √ (WT-level) | √ (WT-level) |
| 38 | CNAG_06490 |                | <i>YPL150W</i> | 16.36 |              |              |
| 39 | CNAG_05274 |                |                | 16.19 |              |              |
| 40 | CNAG_05005 |                | <i>ATG1</i>    | 16.08 | √ (WT-level) | √ (WT-level) |
| 41 | CNAG_07408 | <i>STE20</i>   | <i>CLA4</i>    | 16.08 |              |              |
| 42 | CNAG_03409 | <i>SKN7</i>    | <i>SKN7</i>    | 15.89 | √ (WT-level) | √ (WT-level) |
| 43 | CNAG_05694 |                | <i>CKA2</i>    | 15.52 |              |              |
| 44 | CNAG_01062 |                | <i>PSK2</i>    | 15.47 | √ (WT-level) | √ (WT-level) |
| 45 | CNAG_01907 |                | <i>CDC5</i>    | 15.47 |              |              |
| 46 | CNAG_06809 | <i>IKS1</i>    | <i>IKS1</i>    | 15.31 |              |              |
| 47 | CNAG_06174 |                | <i>GCN2</i>    | 15.31 | √ (WT-level) | √ (WT-level) |
| 48 | CNAG_05348 | <i>CDC42</i>   | <i>CDC42</i>   | 15.14 |              |              |
| 49 | CNAG_06671 |                |                | 15.05 | √ (WT-level) | √ (WT-level) |
| 50 | CNAG_04118 |                | <i>CTK1</i>    | 14.94 |              |              |
| 51 | CNAG_06697 |                | <i>MPS1</i>    | 14.93 | √ (WT-level) | √ (WT-level) |
| 52 | CNAG_00415 | <i>CDC2801</i> |                | 14.68 | √ (WT-level) | √ (WT-level) |
| 53 | CNAG_03171 | <i>SWE1</i>    |                | 14.65 |              |              |
| 54 | CNAG_06845 |                | <i>CDC15</i>   | 14.62 | √ (WT-level) | √ (WT-level) |
| 55 | CNAG_05484 |                |                | 14.56 | √ (WT-level) | √ (WT-level) |
| 56 | CNAG_05549 |                | <i>SGVI</i>    | 14.55 |              |              |

|    |            |             |                |       |              |              |
|----|------------|-------------|----------------|-------|--------------|--------------|
| 57 | CNAG_04433 |             |                | 14.29 | √ (WT-level) | √ (WT-level) |
| 58 | CNAG_00483 | <i>ACT1</i> | <i>ACT1</i>    | 14.09 |              |              |
| 59 | CNAG_06310 |             |                | 14.03 |              |              |
| 60 | CNAG_00375 | <i>GCN5</i> | <i>GCN5</i>    | 13.8  |              |              |
| 61 | CNAG_05499 |             | <i>SHO1</i>    | 13.75 |              |              |
| 62 | CNAG_02675 |             | <i>HSL1</i>    | 13.6  | √ (WT-level) | √ (WT-level) |
| 63 | CNAG_07667 |             | <i>SAT4</i>    | 13.27 |              |              |
| 64 | CNAG_04282 | <i>MPK2</i> |                | 13.22 | √ (WT-level) | √ (WT-level) |
| 65 | CNAG_05104 |             |                | 12.98 |              |              |
| 66 | CNAG_04272 |             |                | 12.96 | √ (WT-level) | √ (WT-level) |
| 67 | CNAG_05222 | <i>NRG1</i> | <i>NRG1</i>    | 12.91 |              | √ (Reduced)  |
| 68 | CNAG_06151 | <i>YPD1</i> | <i>YPD1</i>    | 12.63 |              |              |
| 69 | CNAG_02962 |             |                | 12.12 |              |              |
| 70 | CNAG_00556 | <i>CCK1</i> | <i>YCK2</i>    | 11.97 | √ (WT-level) | √ (WT-level) |
| 71 | CNAG_02153 | <i>TUP1</i> | <i>TUP1</i>    | 11.83 |              |              |
| 72 | CNAG_04197 |             | <i>YAK1</i>    | 11.5  |              |              |
| 73 | CNAG_02373 |             | <i>VPS33</i>   | 11.46 |              |              |
| 74 | CNAG_02820 |             |                | 11.38 | √ (WT-level) | √ (WT-level) |
| 75 | CNAG_03796 |             | <i>YPL236C</i> | 11.23 | √ (WT-level) | √ (WT-level) |
| 76 | CNAG_05558 | <i>KIN4</i> | <i>KIN4</i>    | 11.08 | √ (WT-level) | √ (WT-level) |
| 77 | CNAG_04837 | <i>MLN1</i> | <i>RTG3</i>    | 11.01 | √ (WT-level) | √ (WT-level) |
| 78 | CNAG_06150 |             | <i>HSC82</i>   | 10.65 |              |              |
| 79 | CNAG_01682 |             | <i>TOM70</i>   | 10.48 |              |              |
| 80 | CNAG_01208 | <i>CCH1</i> | <i>CCH1</i>    | 9.88  |              |              |
| 81 | CNAG_02563 |             | <i>POL3</i>    | 9.81  |              |              |
| 82 | CNAG_05581 | <i>CHS3</i> | <i>CHS3</i>    | 9.58  |              |              |
| 83 | CNAG_03258 |             |                | 9.52  | √ (WT-level) | √ (WT-level) |
| 84 | CNAG_03369 |             | <i>SWE1</i>    | 9.43  | √ (WT-level) | √ (WT-level) |
| 85 | CNAG_05734 |             | <i>SLA1</i>    | 9.29  |              |              |
| 86 | CNAG_02389 |             |                | 9.18  | √ (WT-level) | √ (WT-level) |
| 87 | CNAG_04959 |             | <i>TLG2</i>    | 9.1   |              |              |

|     |            |               |              |      |              |              |
|-----|------------|---------------|--------------|------|--------------|--------------|
| 88  | CNAG_00121 |               | <i>GPD1</i>  | 9.07 |              |              |
| 89  | CNAG_05155 |               | <i>PTP3</i>  | 8.87 |              |              |
| 90  | CNAG_03024 |               | <i>RIM15</i> | 8.76 |              |              |
| 91  | CNAG_07819 |               |              | 8.75 |              |              |
| 92  | CNAG_01371 | <i>CRG2</i>   | <i>RAX1</i>  | 8.72 |              |              |
| 93  | CNAG_03143 | <i>HSP12</i>  | <i>HSP12</i> | 8.59 |              |              |
| 94  | CNAG_01820 | <i>PYK1</i>   | <i>CDC19</i> | 8.55 |              |              |
| 95  | CNAG_06812 | <i>SPO14a</i> | <i>SPO14</i> | 8.51 |              |              |
| 96  | CNAG_04758 | <i>AMT2</i>   | <i>MEP2</i>  | 8.5  |              |              |
| 97  | CNAG_00179 | <i>GPA2</i>   |              | 8.44 | √ (WT-level) | √ (WT-level) |
| 98  | CNAG_04049 |               |              | 8.35 |              |              |
| 99  | CNAG_05563 | <i>HOS2</i>   | <i>HOS2</i>  | 8.28 | √ (Enhanced) | √ (Enhanced) |
| 100 | CNAG_04369 |               |              | 8.2  |              |              |

## Melanin

| Rank | CNAG_ID    | name         | Sc ortholog  | Score | This study (phenotype) | Madhani's study (phenotype) |
|------|------------|--------------|--------------|-------|------------------------|-----------------------------|
| 1    | CNAG_04755 | <i>BCK1</i>  | <i>BCK1</i>  | 32.74 |                        |                             |
| 2    | CNAG_06301 | <i>SCH9</i>  | <i>SCH9</i>  | 31.32 | √ (WT-level)           | √ (WT-level)                |
| 3    | CNAG_04514 | <i>MPK1</i>  | <i>SLT2</i>  | 30.71 | √ (WT-level)           | √ (WT-level)                |
| 4    | CNAG_01664 |              | <i>CDC28</i> | 27.73 |                        |                             |
| 5    | CNAG_04148 |              | <i>KIN3</i>  | 23.46 |                        |                             |
| 6    | CNAG_08022 |              | <i>PHO85</i> | 23.06 |                        |                             |
| 7    | CNAG_02531 | <i>CPK2</i>  | <i>FUS3</i>  | 22.93 | √ (WT-level)           | √ (WT-level)                |
| 8    | CNAG_04678 | <i>YPK1</i>  | <i>YPK1</i>  | 22.7  |                        |                             |
| 9    | CNAG_06730 | <i>GSK3</i>  | <i>RIM11</i> | 22.48 |                        |                             |
| 10   | CNAG_06980 | <i>STE11</i> | <i>STE11</i> | 22    |                        |                             |
| 11   | CNAG_06568 |              | <i>SKS1</i>  | 21.96 | √ (WT-level)           | √ (WT-level)                |
| 12   | CNAG_01285 |              | <i>IPL1</i>  | 21.94 |                        |                             |
| 13   | CNAG_02194 |              | <i>DBF20</i> | 21.83 |                        |                             |
| 14   | CNAG_03167 |              | <i>CHK1</i>  | 21.7  |                        |                             |

|    |            |              |                |       |              |              |
|----|------------|--------------|----------------|-------|--------------|--------------|
| 15 | CNAG_02915 | <i>PDK1</i>  | <i>PKH2</i>    | 21.68 | √ (Reduced)  | √ (WT-level) |
| 16 | CNAG_05970 |              | <i>STE20</i>   | 21.6  |              |              |
| 17 | CNAG_00293 | <i>RAS1</i>  | <i>RAS2</i>    | 21.58 |              |              |
| 18 | CNAG_05216 |              | <i>RAD53</i>   | 21.57 | √ (WT-level) | √ (WT-level) |
| 19 | CNAG_02511 | <i>CPK1</i>  |                | 21.5  | √ (WT-level) | √ (WT-level) |
| 20 | CNAG_06086 |              | <i>SSN3</i>    | 21.49 | √ (Reduced)  | √ (WT-level) |
| 21 | CNAG_03567 | <i>CBK1</i>  | <i>CBK1</i>    | 20.83 |              |              |
| 22 | CNAG_01938 | <i>KIN1</i>  | <i>KIN1</i>    | 20.64 | √ (Enhanced) | √ (WT-level) |
| 23 | CNAG_01907 |              | <i>CDC5</i>    | 20.53 |              |              |
| 24 | CNAG_01730 | <i>STE7</i>  | <i>STE7</i>    | 20.52 | √ (WT-level) | √ (WT-level) |
| 25 | CNAG_00683 |              | <i>KNS1</i>    | 20.46 |              |              |
| 26 | CNAG_00745 |              | <i>NPR1</i>    | 20.43 | √ (WT-level) | √ (WT-level) |
| 27 | CNAG_00405 | <i>KIC1</i>  | <i>KIC1</i>    | 20.15 |              |              |
| 28 | CNAG_03290 |              | <i>SPS1</i>    | 20.12 | √ (Enhanced) | √ (WT-level) |
| 29 | CNAG_06445 |              | <i>KIN28</i>   | 20.04 |              |              |
| 30 | CNAG_04040 |              | <i>FPK1</i>    | 19.99 | √ (WT-level) | √ (WT-level) |
| 31 | CNAG_05439 |              | <i>CMK2</i>    | 19.56 | √ (WT-level) | √ (WT-level) |
| 32 | CNAG_06490 |              | <i>YPL150W</i> | 19.44 |              |              |
| 33 | CNAG_06845 |              | <i>CDC15</i>   | 19.36 | √ (WT-level) | √ (WT-level) |
| 34 | CNAG_05005 |              | <i>ATG1</i>    | 19.12 | √ (WT-level) | √ (WT-level) |
| 35 | CNAG_03811 |              |                | 19.08 | √ (WT-level) | √ (WT-level) |
| 36 | CNAG_01062 |              | <i>PSK2</i>    | 18.83 | √ (WT-level) | √ (WT-level) |
| 37 | CNAG_05694 |              | <i>CKA2</i>    | 18.57 |              |              |
| 38 | CNAG_06809 | <i>IKS1</i>  | <i>IKS1</i>    | 18.36 |              |              |
| 39 | CNAG_07408 | <i>STE20</i> | <i>CLA4</i>    | 18.22 |              |              |
| 40 | CNAG_05484 |              |                | 18.19 | √ (WT-level) | √ (WT-level) |
| 41 | CNAG_05274 |              |                | 18.16 |              |              |
| 42 | CNAG_04162 | <i>PKA2</i>  |                | 18.11 | √ (WT-level) | √ (WT-level) |
| 43 | CNAG_06671 |              |                | 18.07 | √ (WT-level) | √ (WT-level) |
| 44 | CNAG_03171 | <i>SWE1</i>  |                | 17.97 |              |              |

|    |            |                |                |       |              |              |
|----|------------|----------------|----------------|-------|--------------|--------------|
| 45 | CNAG_04118 |                | <i>CTK1</i>    | 17.83 |              |              |
| 46 | CNAG_06697 |                | <i>MPS1</i>    | 17.75 | √ (WT-level) | √ (WT-level) |
| 47 | CNAG_00415 | <i>CDC2801</i> |                | 17.46 |              | √ (Reduced)  |
| 48 | CNAG_05549 |                | <i>SGV1</i>    | 17.28 |              |              |
| 49 | CNAG_06310 |                |                | 17.24 |              |              |
| 50 | CNAG_02675 |                | <i>HSL1</i>    | 17.22 | √ (WT-level) | √ (WT-level) |
| 51 | CNAG_04282 | <i>MPK2</i>    |                | 16.82 | √ (WT-level) | √ (WT-level) |
| 52 | CNAG_03670 | <i>IRE1</i>    | <i>IRE1</i>    | 16.61 |              |              |
| 53 | CNAG_07427 | <i>CCK2</i>    | <i>HRR25</i>   | 16.57 |              |              |
| 54 | CNAG_04272 |                |                | 15.95 | √ (WT-level) | √ (WT-level) |
| 55 | CNAG_06174 |                | <i>GCN2</i>    | 15.58 | √ (WT-level) | √ (WT-level) |
| 56 | CNAG_00556 | <i>CCK1</i>    | <i>YCK2</i>    | 15.56 |              | √ (Reduced)  |
| 57 | CNAG_07667 |                | <i>SAT4</i>    | 15.17 |              |              |
| 58 | CNAG_05348 | <i>CDC42</i>   | <i>CDC42</i>   | 15.15 |              |              |
| 59 | CNAG_07675 |                | <i>IRA2</i>    | 15.1  |              |              |
| 60 | CNAG_02962 |                |                | 15.03 |              |              |
| 61 | CNAG_00570 | <i>PKR1</i>    | <i>BCY1</i>    | 14.58 |              |              |
| 62 | CNAG_04433 |                |                | 14.58 | √ (WT-level) | √ (WT-level) |
| 63 | CNAG_05104 |                |                | 14.45 |              |              |
| 64 | CNAG_01682 |                | <i>TOM70</i>   | 14.34 |              |              |
| 65 | CNAG_05499 |                | <i>SHO1</i>    | 13.93 |              |              |
| 66 | CNAG_03315 | <i>RHO1</i>    | <i>RHO1</i>    | 13.75 |              |              |
| 67 | CNAG_03796 |                | <i>YPL236C</i> | 13.59 | √ (WT-level) | √ (WT-level) |
| 68 | CNAG_05155 |                | <i>PTP3</i>    | 13.54 |              |              |
| 69 | CNAG_06151 | <i>YPD1</i>    | <i>YPD1</i>    | 12.95 |              |              |
| 70 | CNAG_02153 | <i>TUP1</i>    | <i>TUP1</i>    | 12.85 |              |              |
| 71 | CNAG_02820 |                |                | 12.79 | √ (WT-level) | √ (WT-level) |
| 72 | CNAG_05222 | <i>NRG1</i>    | <i>NRG1</i>    | 12.77 |              |              |
| 73 | CNAG_04197 |                | <i>YAK1</i>    | 12.64 |              |              |
| 74 | CNAG_02373 |                | <i>VPS33</i>   | 12.18 |              |              |
| 75 | CNAG_03369 |                | <i>SWE1</i>    | 11.85 | √ (WT-level) | √ (WT-level) |

|     |            |              |                |       |              |              |
|-----|------------|--------------|----------------|-------|--------------|--------------|
| 76  | CNAG_04049 |              |                | 11.69 |              |              |
| 77  | CNAG_02389 |              |                | 11.5  | √ (WT-level) | √ (WT-level) |
| 78  | CNAG_05558 | <i>KIN4</i>  | <i>KIN4</i>    | 11.12 | √ (WT-level) | √ (WT-level) |
| 79  | CNAG_07942 |              | <i>CDC25</i>   | 10.97 |              |              |
| 80  | CNAG_02028 |              | <i>SKY1</i>    | 10.6  |              |              |
| 81  | CNAG_04837 | <i>MLN1</i>  | <i>RTG3</i>    | 10.46 |              | √ (Reduced)  |
| 82  | CNAG_03258 |              |                | 10.38 | √ (WT-level) | √ (WT-level) |
| 83  | CNAG_03024 |              | <i>RIM15</i>   | 10.36 |              |              |
| 84  | CNAG_02185 |              | <i>YNL022C</i> | 10.23 |              |              |
| 85  | CNAG_03791 |              | <i>SAK1</i>    | 10.21 |              |              |
| 86  | CNAG_01208 | <i>CCH1</i>  | <i>CCH1</i>    | 10.12 |              |              |
| 87  | CNAG_01347 |              |                | 10.02 |              |              |
| 88  | CNAG_05704 |              | <i>SNF8</i>    | 10.02 |              |              |
| 89  | CNAG_01612 |              |                | 9.95  |              |              |
| 90  | CNAG_03143 | <i>HSP12</i> | <i>HSP12</i>   | 9.79  |              |              |
| 91  | CNAG_01988 | <i>TCO3</i>  | <i>SLN1</i>    | 9.79  | √ (WT-level) | √ (WT-level) |
| 92  | CNAG_00782 |              |                | 9.69  | √ (WT-level) | √ (WT-level) |
| 93  | CNAG_00483 | <i>ACT1</i>  | <i>ACT1</i>    | 9.61  |              |              |
| 94  | CNAG_06642 | <i>TOR1</i>  | <i>TOR2</i>    | 9.53  |              |              |
| 95  | CNAG_01902 |              | <i>CYC8</i>    | 9.13  |              |              |
| 96  | CNAG_05734 |              | <i>SLA1</i>    | 8.81  |              |              |
| 97  | CNAG_03706 |              | <i>GLC7</i>    | 8.81  |              |              |
| 98  | CNAG_03998 | <i>RLM1</i>  | <i>RLM1</i>    | 8.67  | √ (WT-level) | √ (WT-level) |
| 99  | CNAG_00537 |              | <i>CAT2</i>    | 8.59  |              |              |
| 100 | CNAG_05932 |              | <i>CPR6</i>    | 8.41  |              |              |

## Thermotolerance

| Rank | CNAG_ID    | name | Sc ortholog  | Score | This study (phenotype) | Madhani's study (phenotype) |
|------|------------|------|--------------|-------|------------------------|-----------------------------|
| 1    | CNAG_05970 |      | <i>STE20</i> | 29.79 |                        |                             |
| 2    | CNAG_01664 |      | <i>CDC28</i> | 27.97 |                        |                             |

|    |            |              |                |       |              |              |
|----|------------|--------------|----------------|-------|--------------|--------------|
| 3  | CNAG_02531 | <i>CPK2</i>  | <i>FUS3</i>    | 25.99 |              | √ (Reduced)  |
| 4  | CNAG_00396 | <i>PKA1</i>  | <i>TPK1</i>    | 25.42 | √ (WT-level) | √ (WT-level) |
| 5  | CNAG_07408 | <i>STE20</i> | <i>CLA4</i>    | 25.3  |              |              |
| 6  | CNAG_08022 |              | <i>PHO85</i>   | 25.25 |              |              |
| 7  | CNAG_02511 | <i>CPK1</i>  |                | 25.1  | √ (WT-level) | √ (WT-level) |
| 8  | CNAG_04678 | <i>YPK1</i>  | <i>YPK1</i>    | 24.55 |              |              |
| 9  | CNAG_01938 | <i>KIN1</i>  | <i>KIN1</i>    | 24.31 | √ (Reduced)  | √ (WT-level) |
| 10 | CNAG_06086 |              | <i>SSN3</i>    | 24.27 | √ (WT-level) | √ (WT-level) |
| 11 | CNAG_01730 | <i>STE7</i>  | <i>STE7</i>    | 23.75 | √ (WT-level) | √ (WT-level) |
| 12 | CNAG_00130 | <i>HRK1</i>  | <i>RCK2</i>    | 23.57 | √ (WT-level) | √ (WT-level) |
| 13 | CNAG_06730 | <i>GSK3</i>  | <i>RIM11</i>   | 23.18 |              |              |
| 14 | CNAG_03409 | <i>SKN7</i>  | <i>SKN7</i>    | 23.04 |              | √ (Reduced)  |
| 15 | CNAG_04148 |              | <i>KIN3</i>    | 22.89 |              |              |
| 16 | CNAG_03171 | <i>SWE1</i>  |                | 22.81 |              |              |
| 17 | CNAG_03567 | <i>CBK1</i>  | <i>CBK1</i>    | 22.67 |              |              |
| 18 | CNAG_01285 |              | <i>IPL1</i>    | 22.58 |              |              |
| 19 | CNAG_06980 | <i>STE11</i> | <i>STE11</i>   | 22.31 |              |              |
| 20 | CNAG_02915 | <i>PDK1</i>  | <i>PKH2</i>    | 22.1  | √ (Reduced)  | √ (Reduced)  |
| 21 | CNAG_00405 | <i>KIC1</i>  | <i>KIC1</i>    | 22.06 |              |              |
| 22 | CNAG_03167 |              | <i>CHK1</i>    | 22.02 |              |              |
| 23 | CNAG_03290 |              | <i>SPS1</i>    | 21.97 | √ (Reduced)  | √ (Reduced)  |
| 24 | CNAG_02194 |              | <i>DBF20</i>   | 21.92 |              |              |
| 25 | CNAG_05499 |              | <i>SHO1</i>    | 21.88 |              |              |
| 26 | CNAG_06552 | <i>SNF1</i>  | <i>SNF1</i>    | 21.72 | √ (Reduced)  | √ (WT-level) |
| 27 | CNAG_05216 |              | <i>RAD53</i>   | 21.69 | √ (WT-level) | √ (WT-level) |
| 28 | CNAG_06445 |              | <i>KIN28</i>   | 21.68 |              |              |
| 29 | CNAG_04040 |              | <i>FPK1</i>    | 21.47 | √ (WT-level) | √ (WT-level) |
| 30 | CNAG_05439 |              | <i>CMK2</i>    | 21.37 | √ (WT-level) | √ (WT-level) |
| 31 | CNAG_01907 |              | <i>CDC5</i>    | 21.2  |              |              |
| 32 | CNAG_03811 |              |                | 21.15 |              | √ (Reduced)  |
| 33 | CNAG_06490 |              | <i>YPL150W</i> | 20.8  |              |              |



|    |            |                |              |       |              |              |
|----|------------|----------------|--------------|-------|--------------|--------------|
| 34 | CNAG_06568 |                | <i>SKS1</i>  | 20.77 | √ (WT-level) | √ (WT-level) |
| 35 | CNAG_00683 |                | <i>KNS1</i>  | 20.58 |              |              |
| 36 | CNAG_06671 |                |              | 20.35 | √ (WT-level) | √ (WT-level) |
| 37 | CNAG_07427 | <i>CCK2</i>    | <i>HRR25</i> | 20.26 |              |              |
| 38 | CNAG_05005 |                | <i>ATG1</i>  | 20.23 | √ (WT-level) | √ (WT-level) |
| 39 | CNAG_01062 |                | <i>PSK2</i>  | 19.78 | √ (WT-level) | √ (WT-level) |
| 40 | CNAG_03315 | <i>RHO1</i>    | <i>RHO1</i>  | 19.71 |              |              |
| 41 | CNAG_04118 |                | <i>CTK1</i>  | 19.54 |              | √ (Reduced)  |
| 42 | CNAG_06697 |                | <i>MPS1</i>  | 19.41 | √ (Reduced)  | √ (WT-level) |
| 43 | CNAG_05549 |                | <i>SGV1</i>  | 19.4  |              |              |
| 44 | CNAG_00415 | <i>CDC2801</i> |              | 19.38 | √ (Reduced)  | √ (WT-level) |
| 45 | CNAG_06845 |                | <i>CDC15</i> | 19.35 | √ (Reduced)  | √ (Reduced)  |
| 46 | CNAG_04162 | <i>PKA2</i>    |              | 19.22 | √ (WT-level) | √ (WT-level) |
| 47 | CNAG_04505 | <i>GPA1</i>    | <i>GPA2</i>  | 19.09 |              |              |
| 48 | CNAG_02675 |                | <i>HSL1</i>  | 18.79 | √ (Reduced)  | √ (Reduced)  |
| 49 | CNAG_04282 | <i>MPK2</i>    |              | 18.46 |              | √ (Reduced)  |
| 50 | CNAG_05484 |                |              | 18.24 | √ (WT-level) | √ (WT-level) |
| 51 | CNAG_05274 |                |              | 18.1  |              |              |
| 52 | CNAG_05694 |                | <i>CKA2</i>  | 18.04 |              |              |
| 53 | CNAG_06809 | <i>IKS1</i>    | <i>IKS1</i>  | 17.97 |              |              |
| 54 | CNAG_06310 |                |              | 17.92 |              |              |
| 55 | CNAG_00745 |                | <i>NPR1</i>  | 16.74 | √ (WT-level) | √ (WT-level) |
| 56 | CNAG_04272 |                |              | 16.73 | √ (WT-level) | √ (WT-level) |
| 57 | CNAG_07667 |                | <i>SAT4</i>  | 16.45 |              |              |
| 58 | CNAG_06174 |                | <i>GCN2</i>  | 16.45 | √ (WT-level) | √ (WT-level) |
| 59 | CNAG_00556 | <i>CCK1</i>    | <i>YCK2</i>  | 16.04 | √ (Reduced)  | √ (WT-level) |
| 60 | CNAG_03998 | <i>RLM1</i>    | <i>RLM1</i>  | 15.69 | √ (WT-level) | √ (WT-level) |
| 61 | CNAG_05104 |                |              | 15.54 |              |              |
| 62 | CNAG_02962 |                |              | 15.4  |              |              |
| 63 | CNAG_06151 | <i>YPD1</i>    | <i>YPD1</i>  | 15.36 |              |              |

|    |            |             |                |       |              |              |
|----|------------|-------------|----------------|-------|--------------|--------------|
| 64 | CNAG_03796 |             | <i>YPL236C</i> | 15.11 | √ (WT-level) | √ (WT-level) |
| 65 | CNAG_04433 |             |                | 14.26 | √ (WT-level) | √ (WT-level) |
| 66 | CNAG_02820 |             |                | 14.17 | √ (WT-level) | √ (WT-level) |
| 67 | CNAG_04119 | <i>ROM2</i> | <i>ROM2</i>    | 13.69 |              |              |
| 68 | CNAG_05838 | <i>RGD1</i> | <i>RGD1</i>    | 13.62 | √ (WT-level) | √ (WT-level) |
| 69 | CNAG_01682 |             | <i>TOM70</i>   | 12.96 |              |              |
| 70 | CNAG_05558 | <i>KIN4</i> | <i>KIN4</i>    | 12.77 | √ (Reduced)  | √ (Reduced)  |
| 71 | CNAG_04197 |             | <i>YAK1</i>    | 12.77 |              |              |
| 72 | CNAG_04049 |             |                | 12.7  |              |              |
| 73 | CNAG_05581 | <i>CHS3</i> | <i>CHS3</i>    | 12.61 |              |              |
| 74 | CNAG_03369 |             | <i>SWE1</i>    | 12.26 | √ (WT-level) | √ (WT-level) |
| 75 | CNAG_03258 |             |                | 12.17 | √ (WT-level) | √ (WT-level) |
| 76 | CNAG_04090 | <i>ATF1</i> |                | 12.11 |              |              |
| 77 | CNAG_02373 |             | <i>VPS33</i>   | 11.99 |              |              |
| 78 | CNAG_06501 |             | <i>GAS1</i>    | 11.13 |              |              |
| 79 | CNAG_00888 | <i>CNBI</i> | <i>CNBI</i>    | 11.01 |              |              |
| 80 | CNAG_05734 |             | <i>SLA1</i>    | 10.98 |              |              |
| 81 | CNAG_02389 |             |                | 10.98 | √ (WT-level) | √ (WT-level) |
| 82 | CNAG_05081 | <i>PDE1</i> | <i>PDE1</i>    | 10.93 |              |              |
| 83 | CNAG_06597 | <i>SPT8</i> | <i>SPT8</i>    | 10.8  |              |              |
| 84 | CNAG_01612 |             |                | 10.8  |              |              |
| 85 | CNAG_06642 | <i>TOR1</i> | <i>TOR2</i>    | 10.71 |              |              |
| 86 | CNAG_04837 | <i>MLN1</i> | <i>RTG3</i>    | 10.64 | √ (WT-level) | √ (WT-level) |
| 87 | CNAG_06508 | <i>FKS1</i> | <i>GSC2</i>    | 10.61 |              |              |
| 88 | CNAG_03024 |             | <i>RIM15</i>   | 10.55 |              |              |
| 89 | CNAG_02028 |             | <i>SKY1</i>    | 10.53 |              |              |
| 90 | CNAG_05218 | <i>ACA1</i> | <i>SRV2</i>    | 10.51 |              |              |
| 91 | CNAG_05155 |             | <i>PTP3</i>    | 10.21 |              |              |
| 92 | CNAG_01208 | <i>CCH1</i> | <i>CCH1</i>    | 10.19 |              |              |
| 93 | CNAG_04815 | <i>BNI1</i> | <i>BNI1</i>    | 10.12 |              |              |
| 94 | CNAG_03345 | <i>SSD1</i> | <i>SSD1</i>    | 9.73  |              |              |

|     |            |             |                |      |              |              |
|-----|------------|-------------|----------------|------|--------------|--------------|
| 95  | CNAG_01347 |             |                | 9.38 |              |              |
| 96  | CNAG_05222 | <i>NRG1</i> | <i>NRG1</i>    | 9.28 |              |              |
| 97  | CNAG_00782 |             |                | 9.14 | √ (WT-level) | √ (WT-level) |
| 98  | CNAG_03967 |             | <i>CAP1</i>    | 8.91 |              | √ (Reduced)  |
| 99  | CNAG_02185 |             | <i>YNL022C</i> | 8.86 |              |              |
| 100 | CNAG_06898 |             | <i>CHS7</i>    | 8.65 |              |              |

**Supplementary Table S4. 230 upregulated genes upon fluconazol treatment (> 2 fold change)**

| H99 locus ID | Gene name     | Fold change |
|--------------|---------------|-------------|
| CNAG_03644   | <i>CAS3</i>   | 11.60743947 |
| CNAG_01737   | <i>ERG25</i>  | 4.100518739 |
| CNAG_03007   |               | 9.893845024 |
| CNAG_03204   |               | 4.961017102 |
| CNAG_02896   | <i>ERG130</i> | 3.435417488 |
| CNAG_00854   | <i>ERG2</i>   | 4.025915577 |
| CNAG_04280   |               | 5.861502749 |
| CNAG_02226   |               | 5.406848223 |
| CNAG_02701   |               | 5.866838761 |
| CNAG_01841   | <i>GLN3</i>   | 4.971495898 |
| CNAG_07486   |               | 4.266962877 |
| CNAG_07492   |               | 6.45571552  |
| CNAG_01856   |               | 3.445989571 |
| CNAG_01750   |               | 2.835550804 |
| CNAG_03122   |               | 2.730722453 |
| CNAG_05159   |               | 3.481718653 |
| CNAG_07596   |               | 3.586669867 |
| CNAG_06020   |               | 2.884107728 |
| CNAG_00699   |               | 4.907805416 |
| CNAG_02523   |               | 2.763268524 |
| CNAG_03238   |               | 3.15748165  |
| CNAG_02776   |               | 3.207504667 |
| CNAG_03848   |               | 4.060469166 |
| CNAG_06336   |               | 2.604440066 |
| CNAG_07450   |               | 2.45835813  |
| CNAG_04934   |               | 2.509589739 |
| CNAG_03176   |               | 2.500790953 |
| CNAG_03461   |               | 5.522200944 |

|            |             |             |
|------------|-------------|-------------|
| CNAG_03974 |             | 3.112888768 |
| CNAG_05338 |             | 2.440693079 |
| CNAG_05545 |             | 2.261789837 |
| CNAG_07448 | <i>DUR3</i> | 4.66774394  |
| CNAG_05258 |             | 4.820232874 |
| CNAG_05113 |             | 2.366303137 |
| CNAG_04632 |             | 5.792334022 |
| CNAG_02389 |             | 2.805017954 |
| CNAG_00519 | <i>ERG3</i> | 2.30839147  |
| CNAG_01742 | <i>AQY1</i> | 3.880759245 |
| CNAG_02797 | <i>CPL1</i> | 3.004409816 |
| CNAG_06443 | <i>KAR2</i> | 2.329963569 |
| CNAG_06482 |             | 2.25129493  |
| CNAG_04758 | <i>AMT2</i> | 3.210331716 |
| CNAG_00679 |             | 3.714772521 |
| CNAG_06347 | <i>BLP2</i> | 6.837556225 |
| CNAG_04675 |             | 3.435086428 |
| CNAG_00895 | <i>ZIP1</i> | 2.160317283 |
| CNAG_03857 |             | 2.224809082 |
| CNAG_07731 |             | 3.416125193 |
| CNAG_01207 |             | 3.1057044   |
| CNAG_06829 | <i>ERG1</i> | 2.704018074 |
| CNAG_01090 |             | 2.238673309 |
| CNAG_01796 |             | 3.94460594  |
| CNAG_03999 |             | 3.170201929 |
| CNAG_04210 |             | 2.245062609 |
| CNAG_06266 |             | 2.233119834 |
| CNAG_06509 |             | 4.243572986 |
| CNAG_06424 |             | 2.524879793 |
| CNAG_02990 |             | 2.350044469 |
| CNAG_04747 |             | 2.158331318 |

|            |               |             |
|------------|---------------|-------------|
| CNAG_04782 |               | 2.153770613 |
| CNAG_03913 |               | 2.534772224 |
| CNAG_03294 |               | 2.180905748 |
| CNAG_02156 |               | 2.346358666 |
| CNAG_02446 |               | 2.419291822 |
| CNAG_05453 |               | 2.593700242 |
| CNAG_03078 |               | 2.006918961 |
| CNAG_03316 | <i>RDII</i>   | 2.014463256 |
| CNAG_05458 |               | 3.250183492 |
| CNAG_00544 |               | 2.032973435 |
| CNAG_02552 |               | 2.805682916 |
| CNAG_04313 |               | 2.005395196 |
| CNAG_05521 |               | 2.09220702  |
| CNAG_00040 | <i>ERG11</i>  | 3.060460867 |
| CNAG_05678 |               | 2.570092635 |
| CNAG_02531 | <i>CPK2</i>   | 2.478999734 |
| CNAG_00696 |               | 2.956934211 |
| CNAG_05592 | <i>ECA1</i>   | 2.590543496 |
| CNAG_00407 |               | 2.33564059  |
| CNAG_06785 |               | 2.156432684 |
| CNAG_05023 | <i>CAS91</i>  | 2.063796764 |
| CNAG_02176 |               | 2.497828778 |
| CNAG_04017 |               | 2.69421758  |
| CNAG_06644 | <i>ERG5</i>   | 3.019376085 |
| CNAG_07633 |               | 2.304366491 |
| CNAG_02225 | <i>EXG104</i> | 3.47656117  |
| CNAG_06652 |               | 2.366321132 |
| CNAG_03664 | <i>NIC1</i>   | 2.128492371 |
| CNAG_02440 |               | 2.295752063 |
| CNAG_00038 |               | 2.018871609 |
| CNAG_04681 |               | 2.395168859 |

|            |               |             |
|------------|---------------|-------------|
| CNAG_01861 |               | 2.072645093 |
| CNAG_00419 |               | 2.86195785  |
| CNAG_07902 |               | 2.419220693 |
| CNAG_02830 | <i>ERG4</i>   | 2.420948502 |
| CNAG_01129 | <i>ERG7</i>   | 2.549941476 |
| CNAG_03385 | <i>PCL103</i> | 2.283950008 |
| CNAG_00751 |               | 3.111496815 |
| CNAG_01070 |               | 2.859000112 |
| CNAG_06863 |               | 2.0519339   |
| CNAG_03400 |               | 2.908045958 |
| CNAG_05841 |               | 2.070408262 |
| CNAG_00691 |               | 2.205021879 |
| CNAG_00605 |               | 2.13554549  |
| CNAG_00302 |               | 2.198066632 |
| CNAG_06331 |               | 2.300082232 |
| CNAG_02918 | <i>ERG10</i>  | 2.449583486 |
| CNAG_04635 |               | 2.379529269 |
| CNAG_04874 |               | 2.812216398 |
| CNAG_02964 |               | 2.061018137 |
| CNAG_03163 |               | 2.402112615 |
| CNAG_04652 |               | 2.432521954 |
| CNAG_00818 |               | 2.000727327 |
| CNAG_03326 | <i>CHS2</i>   | 2.41060654  |
| CNAG_00247 | <i>LYS9</i>   | 2.021856778 |
| CNAG_05607 |               | 2.662405297 |
| CNAG_04553 |               | 3.27177622  |
| CNAG_04804 | <i>SRE1</i>   | 5.564225285 |
| CNAG_05736 |               | 2.285635428 |
| CNAG_00331 |               | 2.447695837 |
| CNAG_02718 |               | 2.176061773 |
| CNAG_05932 |               | 2.753627491 |

|            |              |             |
|------------|--------------|-------------|
| CNAG_00132 |              | 2.727910719 |
| CNAG_02848 |              | 2.183183028 |
| CNAG_00838 |              | 2.428786635 |
| CNAG_01718 |              | 2.057848977 |
| CNAG_06727 |              | 2.175837382 |
| CNAG_05289 |              | 2.245503035 |
| CNAG_02217 | <i>CHS7</i>  | 2.639549802 |
| CNAG_04413 |              | 3.156348677 |
| CNAG_02297 |              | 2.294933532 |
| CNAG_04862 |              | 2.071920132 |
| CNAG_03651 |              | 2.003144033 |
| CNAG_03816 |              | 2.452008141 |
| CNAG_07943 |              | 2.679043773 |
| CNAG_04640 | <i>ACLI</i>  | 2.053883538 |
| CNAG_02308 |              | 2.101464305 |
| CNAG_06296 |              | 3.93552104  |
| CNAG_02735 |              | 4.903857337 |
| CNAG_07337 |              | 2.028760911 |
| CNAG_01131 |              | 2.027670489 |
| CNAG_02309 |              | 2.11137462  |
| CNAG_00117 | <i>ERG24</i> | 2.436478079 |
| CNAG_05005 |              | 2.326199159 |
| CNAG_07476 |              | 2.467123277 |
| CNAG_01736 |              | 2.274198065 |
| CNAG_05778 |              | 2.000546899 |
| CNAG_03698 |              | 2.034237514 |
| CNAG_03709 |              | 2.204269454 |
| CNAG_07463 |              | 2.406976199 |
| CNAG_02062 |              | 2.314773587 |
| CNAG_02052 |              | 2.589101725 |
| CNAG_05024 |              | 2.058801357 |



|            |             |             |
|------------|-------------|-------------|
| CNAG_01706 |             | 2.013315237 |
| CNAG_00652 |             | 2.977733917 |
| CNAG_00164 |             | 2.268927265 |
| CNAG_01695 |             | 2.142598003 |
| CNAG_03754 |             | 2.456715849 |
| CNAG_00157 |             | 2.003158066 |
| CNAG_01957 |             | 2.020821188 |
| CNAG_05252 |             | 2.042608164 |
| CNAG_00454 |             | 2.643050182 |
| CNAG_02934 |             | 3.052457927 |
| CNAG_04084 |             | 2.307490961 |
| CNAG_03237 |             | 2.000906047 |
| CNAG_03856 |             | 2.80503012  |
| CNAG_02500 |             | 2.12603782  |
| CNAG_03346 |             | 2.019855655 |
| CNAG_00598 |             | 2.173745452 |
| CNAG_00023 |             | 2.630398477 |
| CNAG_03560 |             | 2.099762767 |
| CNAG_03021 |             | 2.641718848 |
| CNAG_05870 |             | 2.101227513 |
| CNAG_05558 | <i>KIN4</i> | 2.197384541 |
| CNAG_04832 |             | 2.350465716 |
| CNAG_00801 |             | 2.562856914 |
| CNAG_02222 |             | 2.380768794 |
| CNAG_02192 |             | 2.004619275 |
| CNAG_05256 | <i>CAT2</i> | 2.117893164 |
| CNAG_05541 |             | 2.027979224 |
| CNAG_05443 |             | 2.139557938 |
| CNAG_05192 |             | 2.554092586 |
| CNAG_04873 |             | 2.047412618 |
| CNAG_04801 |             | 2.48505801  |

|            |             |             |
|------------|-------------|-------------|
| CNAG_04589 |             | 2.200649668 |
| CNAG_07493 |             | 2.23564484  |
| CNAG_01244 |             | 2.220645594 |
| CNAG_02497 |             | 2.277640498 |
| CNAG_06808 | <i>CPRa</i> | 2.331898848 |
| CNAG_03598 |             | 2.105246993 |
| CNAG_06787 |             | 2.141358214 |
| CNAG_00905 |             | 2.436259285 |
| CNAG_03828 |             | 2.864423668 |
| CNAG_03464 | <i>LAC2</i> | 2.119531919 |
| CNAG_04975 |             | 2.123979621 |
| CNAG_01314 |             | 2.152250629 |
| CNAG_05379 |             | 2.328096422 |
| CNAG_05638 |             | 2.544322173 |
| CNAG_06245 |             | 2.20108488  |
| CNAG_01992 |             | 2.005703165 |
| CNAG_01034 |             | 2.522909142 |
| CNAG_00484 |             | 2.216837227 |
| CNAG_03639 |             | 2.026990697 |
| CNAG_04858 |             | 2.079882603 |
| CNAG_03486 |             | 2.000019906 |
| CNAG_05188 |             | 2.613416987 |
| CNAG_05020 |             | 2.621197783 |
| CNAG_05992 |             | 2.437276546 |
| CNAG_07843 |             | 2.511746725 |
| CNAG_06540 |             | 2.723356183 |
| CNAG_00261 |             | 2.279401635 |
| CNAG_06931 |             | 2.409513121 |
| CNAG_05294 |             | 2.216230896 |
| CNAG_05001 |             | 2.083402951 |
| CNAG_04333 |             | 2.014859926 |

|            |  |             |
|------------|--|-------------|
| CNAG_01194 |  | 2.485825691 |
| CNAG_03944 |  | 2.150102862 |
| CNAG_04642 |  | 2.125378145 |
| CNAG_04562 |  | 2.054816681 |
| CNAG_06365 |  | 2.175916961 |
| CNAG_07380 |  | 5.265638134 |
| CNAG_00376 |  | 2.046841951 |
| CNAG_00887 |  | 3.02481325  |
| CNAG_05093 |  | 2.271206696 |
| CNAG_07909 |  | 2.012455842 |
| CNAG_06133 |  | 2.144202545 |
| CNAG_01827 |  | 2.23421932  |
| CNAG_01689 |  | 2.432645037 |
| CNAG_04711 |  | 2.782921282 |
| CNAG_03337 |  | 2.154466763 |
| CNAG_01672 |  | 2.19161274  |

**Supplementary Table S5. Predicted top 94 candidates (P-value < 0.05) as context-associated hub genes (16 genes involved in ergosterol pathway; 2 genes identified at PMID-22339665; 1 gene identified at PMID-19700638); DEG: Differentially Expressed Gene; √: tested strains**

| Rank | CNAG_ID    | name         | Sc ortholog  | P-value     | Submitted DEG | Test strain |
|------|------------|--------------|--------------|-------------|---------------|-------------|
| 1    | CNAG_04605 | <i>ERG26</i> | <i>ERG26</i> | 2.44E-07    |               |             |
| 2    | CNAG_03311 | <i>ERG13</i> | <i>ERG13</i> | 1.55E-06    |               |             |
| 3    | CNAG_00519 | <i>ERG3</i>  | <i>ERG3</i>  | 5.90E-06    | DEG           |             |
| 4    | CNAG_02363 |              | <i>FLR1</i>  | 8.55E-06    |               | √           |
| 5    | CNAG_01003 | <i>NCPI</i>  | <i>NCPI</i>  | 1.17E-05    |               |             |
| 6    | CNAG_03176 |              | <i>ERO1</i>  | 5.74E-05    | DEG           |             |
| 7    | CNAG_01129 | <i>ERG7</i>  | <i>ERG7</i>  | 7.72E-05    | DEG           |             |
| 8    | CNAG_06829 | <i>ERG1</i>  | <i>ERG1</i>  | 9.59E-05    | DEG           |             |
| 9    | CNAG_04238 |              | <i>SPS19</i> | 0.000125129 |               |             |
| 10   | CNAG_00854 | <i>ERG2</i>  | <i>ERG2</i>  | 0.000420586 | DEG           |             |
| 11   | CNAG_02084 | <i>ERG20</i> | <i>ERG20</i> | 0.000458534 |               |             |
| 12   | CNAG_00115 |              | <i>SOR1</i>  | 0.000480706 |               |             |
| 13   | CNAG_06240 |              | <i>PD11</i>  | 0.000590007 |               |             |
| 14   | CNAG_07448 | <i>DUR3</i>  | <i>DUR3</i>  | 0.000642028 | DEG           |             |
| 15   | CNAG_03486 |              | <i>CPR5</i>  | 0.000707427 | DEG           |             |
| 16   | CNAG_02361 |              | <i>FEN2</i>  | 0.000805704 |               |             |
| 17   | CNAG_03899 |              | <i>LHS1</i>  | 0.000805704 |               |             |
| 18   | CNAG_00305 |              | <i>AHA1</i>  | 0.000819508 |               |             |
| 19   | CNAG_02830 | <i>ERG4</i>  | <i>ERG4</i>  | 0.001146385 | DEG           |             |
| 20   | CNAG_00060 |              |              | 0.001152911 |               |             |
| 21   | CNAG_00869 | <i>PDR5</i>  |              | 0.00117732  |               | √           |
| 22   | CNAG_03618 |              | <i>ZTA1</i>  | 0.001310014 |               |             |
| 23   | CNAG_05137 |              | <i>ERD2</i>  | 0.001460349 |               |             |
| 24   | CNAG_02918 | <i>ERG10</i> | <i>ERG10</i> | 0.001487869 | DEG           |             |
| 25   | CNAG_01737 | <i>ERG25</i> | <i>ERG25</i> | 0.001920833 | DEG           |             |
| 26   | CNAG_03009 | <i>ERG28</i> | <i>ERG28</i> | 0.002726871 |               |             |
| 27   | CNAG_06901 | <i>ALG7</i>  | <i>ALG7</i>  | 0.002776791 |               |             |
| 28   | CNAG_04659 |              | <i>PDC1</i>  | 0.003010344 |               |             |
| 29   | CNAG_02460 | <i>HEM13</i> | <i>HEM13</i> | 0.003379026 |               |             |
| 30   | CNAG_00539 |              | <i>TPO2</i>  | 0.003853456 |               |             |
| 31   | CNAG_06835 | <i>KRE61</i> | <i>KRE6</i>  | 0.004446774 |               |             |
| 32   | CNAG_06534 | <i>HMG1</i>  | <i>HMG2</i>  | 0.004642301 |               |             |
| 33   | CNAG_03939 |              | <i>HEM1</i>  | 0.004642301 |               |             |
| 34   | CNAG_06644 | <i>ERG5</i>  | <i>ERG5</i>  | 0.004795121 | DEG           |             |
| 35   | CNAG_05252 |              | <i>SCJ1</i>  | 0.004845469 | DEG           |             |

|    |            |               |              |             |     |   |
|----|------------|---------------|--------------|-------------|-----|---|
| 36 | CNAG_02365 |               | <i>AMD2</i>  | 0.006255902 |     |   |
| 37 | CNAG_03485 |               | <i>DSK2</i>  | 0.006702894 | DEG | √ |
| 38 | CNAG_03598 |               |              | 0.006702894 |     | √ |
| 39 | CNAG_01955 |               |              | 0.007343171 |     |   |
| 40 | CNAG_05125 |               | <i>MVD1</i>  | 0.007936506 |     |   |
| 41 | CNAG_01696 |               |              | 0.008057294 |     |   |
| 42 | CNAG_01347 |               |              | 0.009380254 |     |   |
| 43 | CNAG_00040 | <i>ERG11</i>  | <i>ERG11</i> | 0.009461903 | DEG |   |
| 44 | CNAG_06241 | <i>CFO1</i>   | <i>FET5</i>  | 0.009867204 |     |   |
| 45 | CNAG_02309 |               | <i>FPR2</i>  | 0.009867204 | DEG |   |
| 46 | CNAG_05136 |               | <i>SPF1</i>  | 0.010273188 |     |   |
| 47 | CNAG_06898 |               | <i>CHS7</i>  | 0.012046246 |     |   |
| 48 | CNAG_04678 | <i>YPK1</i>   | <i>YPK1</i>  | 0.012209923 |     |   |
| 49 | CNAG_00515 |               |              | 0.012622739 |     |   |
| 50 | CNAG_05090 |               |              | 0.012622739 |     | √ |
| 51 | CNAG_07524 |               | <i>AMD1</i>  | 0.012622739 |     |   |
| 52 | CNAG_03079 | <i>PER1</i>   | <i>PER1</i>  | 0.013571067 |     |   |
| 53 | CNAG_02777 | <i>PHO84</i>  | <i>PHO84</i> | 0.013800327 |     |   |
| 54 | CNAG_01076 |               | <i>UGA1</i>  | 0.014026546 |     |   |
| 55 | CNAG_07561 |               | <i>GND1</i>  | 0.014422346 |     |   |
| 56 | CNAG_02225 | <i>EXG104</i> | <i>EXG1</i>  | 0.01596303  | DEG |   |
| 57 | CNAG_08012 |               | <i>VMA3</i>  | 0.017081865 |     |   |
| 58 | CNAG_04514 | <i>MPK1</i>   | <i>SLT2</i>  | 0.018869409 |     | √ |
| 59 | CNAG_06431 |               |              | 0.020392163 |     | √ |
| 60 | CNAG_01615 |               |              | 0.022522129 |     |   |
| 61 | CNAG_01201 |               | <i>MET10</i> | 0.024231447 |     | √ |
| 62 | CNAG_03168 |               | <i>NCB2</i>  | 0.024231447 |     |   |
| 63 | CNAG_02500 |               | <i>CNE1</i>  | 0.025614652 | DEG |   |
| 64 | CNAG_00815 | <i>SIT1</i>   | <i>SIT1</i>  | 0.027295229 |     |   |
| 65 | CNAG_00816 |               | <i>ATG8</i>  | 0.027295229 |     |   |
| 66 | CNAG_05932 |               | <i>CPR6</i>  | 0.027683881 | DEG |   |
| 67 | CNAG_02455 |               | <i>HNMI</i>  | 0.028718526 |     |   |
| 68 | CNAG_02604 |               | <i>HOP1</i>  | 0.029648344 |     |   |
| 69 | CNAG_05538 | <i>JJJ1</i>   | <i>JJJ1</i>  | 0.029787843 |     | √ |
| 70 | CNAG_02489 |               |              | 0.032665171 |     |   |
| 71 | CNAG_00800 |               | <i>PNC1</i>  | 0.032695017 |     |   |
| 72 | CNAG_01464 | <i>FHB1</i>   | <i>YHB1</i>  | 0.033951984 |     |   |
| 73 | CNAG_00711 |               |              | 0.034105583 |     | √ |
| 74 | CNAG_03834 |               | <i>SUR2</i>  | 0.034105583 |     |   |
| 75 | CNAG_06121 |               |              | 0.034105583 |     |   |

|    |            |             |              |             |     |   |
|----|------------|-------------|--------------|-------------|-----|---|
| 76 | CNAG_06361 |             | <i>RPN6</i>  | 0.035357005 |     |   |
| 77 | CNAG_00383 | <i>APT3</i> | <i>DRS2</i>  | 0.035726905 |     |   |
| 78 | CNAG_07779 |             |              | 0.036481894 |     |   |
| 79 | CNAG_00062 |             | <i>STE7</i>  | 0.037328278 |     |   |
| 80 | CNAG_01730 | <i>STE7</i> | <i>RPN3</i>  | 0.037328278 |     | √ |
| 81 | CNAG_03358 |             | <i>PGK1</i>  | 0.037328278 |     |   |
| 82 | CNAG_00064 |             | <i>EMP24</i> | 0.038745979 |     |   |
| 83 | CNAG_06917 | <i>TSA3</i> | <i>PRX1</i>  | 0.040461901 |     |   |
| 84 | CNAG_06927 |             |              | 0.041533921 |     |   |
| 85 | CNAG_01861 |             | <i>NAS6</i>  | 0.042420381 | DEG |   |
| 86 | CNAG_00490 |             | <i>POT1</i>  | 0.042492503 |     |   |
| 87 | CNAG_04388 | <i>SOD2</i> | <i>SOD2</i>  | 0.042685966 |     |   |
| 88 | CNAG_00747 |             | <i>LSC2</i>  | 0.043151587 |     |   |
| 89 | CNAG_04677 |             |              | 0.044210882 |     |   |
| 90 | CNAG_05657 |             |              | 0.044210882 |     |   |
| 91 | CNAG_02484 |             |              | 0.045467679 |     |   |
| 92 | CNAG_04651 |             | <i>ERV29</i> | 0.045467679 |     |   |
| 93 | CNAG_05792 |             | <i>PRE9</i>  | 0.048055995 |     |   |
| 94 | CNAG_02761 |             | <i>PHO88</i> | 0.049898183 |     |   |

**Supplementary Table S6. Inferred GO-BP terms of CNAG\_00711 from its network neighbors**

| Rank | Score | Evidences  | Sc GO biological process terms               | GO biological process terms_supporters(LLS) |
|------|-------|------------|----------------------------------------------|---------------------------------------------|
| 1    | 1.5   | CN-CX:1.00 | NADH oxidation                               | <i>GPD1</i> (1.50)                          |
| 2    | 1.5   | CN-CX:1.00 | intracellular accumulation of glycerol       | <i>GPD1</i> (1.50)                          |
| 3    | 1.42  | CN-CX:1.00 | nucleotide metabolic process                 | <i>HNT1</i> (1.42)                          |
| 4    | 1.27  | CN-CX:1.00 | D-amino acid metabolic process               | <i>HPA3</i> (1.27)                          |
| 5    | 1.27  | CN-CX:1.00 | D-xylose catabolic process                   | <i>YJR096W</i> (1.27)                       |
| 6    | 1.27  | CN-CX:1.00 | arabinose catabolic process                  | <i>YJR096W</i> (1.27)                       |
| 7    | 1.27  | CN-CX:1.00 | cellular response to oxidative stress        | <i>YJR096W</i> (1.27)                       |
| 8    | 1.24  | CN-CX:1.00 | base-excision repair, AP site formation      | <i>MAG1</i> (1.24)                          |
| 9    | 1.24  | CN-CX:1.00 | DNA dealkylation involved in DNA repair      | <i>MAG1</i> (1.24)                          |
| 10   | 1.19  | CN-CX:1.00 | transcription from RNA polymerase I promoter | <i>RPO26</i> (1.19)                         |

**Supplementary Table S7. Functional descriptions of novel genes for *C. neoformans* virulence**

| <b>Gene</b>       | <b>Functional description</b>                                                                                                                                                                                                                                                                                                                                                                                                                                                                                                                        |
|-------------------|------------------------------------------------------------------------------------------------------------------------------------------------------------------------------------------------------------------------------------------------------------------------------------------------------------------------------------------------------------------------------------------------------------------------------------------------------------------------------------------------------------------------------------------------------|
| <i>HOS2</i>       | Deletion increased capsule production. It encodes a histone deacetylase and is implicated in transcriptional regulation in <i>S. cerevisiae</i> <sup>1-3</sup> . Recently, the SAGA histone acetyltransferase complex has been reported to affect the capsule production in <i>C. neoformans</i> <sup>4,5</sup> , indicating that histone acetylation/deacetylation might be indirectly involved in capsule production of <i>C. neoformans</i> by regulating other capsule-related genes.                                                            |
| <i>YPK1</i>       | Deletion significantly influences on melanin and capsule production and thermotolerance, and thereby abolishes the virulence of <i>C. neoformans</i> . In <i>S. cerevisiae</i> , Ypk1 plays roles in sphingolipid synthesis and receptor-mediated endocytosis <sup>6,7</sup> . Similarly, the deletion of <i>YPK1</i> leads to the decreased sphingolipid contents, thereby showing reduced cell viability in response to fluconazole in <i>C. neoformans</i> <sup>8</sup> .                                                                         |
| <i>PDK1</i>       | It encodes a phosphoinositide-dependent kinase 1. Deletion severely impaired melanin production and growth at high temperature, which may result in virulence attenuation. Pdk1 has been reported to play roles in tolerance to azole drugs and high salt stress and <i>in vivo</i> virulence <sup>8,9</sup> .                                                                                                                                                                                                                                       |
| <i>SSN3</i>       | Deletion repressed melanin biosynthesis but promoted capsule production. This might be the reason why the <i>ssn3Δ</i> mutant was as virulent as the wild-type strain, Ssn3 is a cyclin-dependent protein kinase, which is a component of RNA polymerase II holoenzyme and involved in diverse stress responses including thermosensitivity in <i>S. cerevisiae</i> <sup>10,11</sup> . In <i>C. albicans</i> , Ssn3 regulates the expression of iron uptake genes through the Sef1 transcription factor and affects its virulence <sup>12,13</sup> . |
| <i>CDC2801</i>    | It is predicted to encode Ser/Thr and Tyr kinases, and highly homologous to <i>S. cerevisiae</i> Cdc28 (298 aa) encoding cyclin-dependent kinase catalytic subunit. However, CNAG_01664 appears to be a true Cdc28 ortholog (298 aa).                                                                                                                                                                                                                                                                                                                |
| <i>CNAG_03811</i> | It is predicted to encode Ser/Thr and Tyr kinases. Although CNAG_03801 (484 aa) is highly homologous to <i>S. cerevisiae</i> Tpk3 (398 aa) encoding catalytic subunits of cAMP-dependent protein kinase A, CNAG_00396 (Pka1, 515 aa) is more homologous to Tpk3.                                                                                                                                                                                                                                                                                     |



**Supplementary Table S8. GEO expression data sets incorporated into CryptoNet**

| <b>GEO series</b> | <b>Title</b>                                                                                                                                                   | <b>#samples</b> | <b>#node</b> | <b>#edge</b> |
|-------------------|----------------------------------------------------------------------------------------------------------------------------------------------------------------|-----------------|--------------|--------------|
| GSE6226           | Hypoxia response in <i>C. neoformans</i> in H99, CM092 and CM098                                                                                               | 16              | 2101         | 34499        |
| GSE11390          | CoCl <sub>2</sub> Response in <i>Cryptococcus neoformans</i>                                                                                                   | 8               | 1274         | 41517        |
| GSE16692          | Remodeling of global transcription patterns of <i>Cryptococcus neoformans</i> genes mediated by the stress-activated HOG signaling pathways                    | 100             | 4312         | 214974       |
| GSE21176          | Molecular and Functional Characterization of the role of RNA silencing components in <i>Cryptococcus neoformans</i> [RNAi_Serotype A]                          | 16              | 1613         | 30468        |
| GSE21192          | Comparative transcriptome analysis of the CO <sub>2</sub> sensing pathway via differential expressions of carbonic anhydrase in <i>Cryptococcus neoformans</i> | 17              | 2174         | 56489        |
| GSE31911          | Cryptococcal H99 cells grown in 8 conditions for capsule induction                                                                                             | 22              | 3406         | 46530        |
| GSE43370          | Global transcriptome analysis of eukaryotic genes affected by Gromwell extract                                                                                 | 12              | 849          | 15522        |

**Supplementary Table S9. Primers used in this study**

| Primer Name | Sequence (5'-3')                         | Comment                               |
|-------------|------------------------------------------|---------------------------------------|
| B79         | TGTGGATGCTGGCGGAGGATA                    | Screening primer on ACT promoter      |
| B1026       | GTAAAACGACGGCCAGTGAGC                    | M13 forward (extended)                |
| B1027       | CAGGAAACAGCTATGACCATG                    | M13 reverse (extended)                |
| B1454       | AAGGTGTTCCCGACGACGAATCG                  | NSL2                                  |
| B1455       | AACTCCGTCGCGAGCCCCATCAAC                 | NSR2                                  |
| B4213       | TGAGGTGGAGGCTTGTCTAC                     | <i>KINI</i> - 5' screening primer     |
| B4209       | AGAGACAAAGGTGAGGTCCG                     | <i>KINI</i> - left flanking primer 1  |
| B4210       | TCACTGGCCGTCGTTTTACCACGGGATAATGTTGACG    | <i>KINI</i> - left flanking primer 2  |
| B4211       | CATGGTCATAGCTGTTTCCTGGCAGTATCAAATGCTGGC  | <i>KINI</i> - right flanking primer 1 |
| B4212       | AGATAATAAGGGTGC GGC                      | <i>KINI</i> - right flanking primer 2 |
| B4214       | GGACTTCTTTGGTTGGGAG                      | <i>KINI</i> – Southern probe primer 1 |
| B4203       | AACGAACGGAAGATTGGC                       | <i>SHO1</i> - 5' screening primer     |
| B4204       | ATCTCCAATCTCCGAAG                        | <i>SHO1</i> - left flanking primer 1  |
| B4205       | TCACTGGCCGTCGTTTTACAAGAAAGACTGGGTGTCGC   | <i>SHO1</i> - left flanking primer 2  |
| B4206       | CATGGTCATAGCTGTTTCCTGACACCCGCTGGTATTACAG | <i>SHO1</i> - right flanking primer 1 |
| B4207       | AAGTTTTCTCCACTCGCC                       | <i>SHO1</i> - right flanking primer 2 |
| B4208       | GCTGCTTACTACATCTGGACG                    | <i>SHO1</i> – Southern probe primer 1 |
| B4173       | TACCCATCATTCCTGCTC                       | <i>YPK1</i> - 5' screening primer     |
| B4169       | CGACTATGGGTTCGTTACTGG                    | <i>YPK1</i> - left flanking primer 1  |
| B4170       | TCACTGGCCGTCGTTTTACTGTCTATGCGTTTTCCGAC   | <i>YPK1</i> - left flanking primer 2  |
| B4171       | CATGGTCATAGCTGTTTCCTGTGGTGTAGAATGGCAGAGC | <i>YPK1</i> - right flanking primer 1 |
| B4172       | GCACCGTGGAGGTAGTAATG                     | <i>YPK1</i> - right flanking primer 2 |
| B4174       | ACACCGTATCAGCACAAGC                      | <i>YPK1</i> – Southern probe primer 1 |

## Supplementary Methods

### Sequence and functional annotation data for *Cryptococcus neoformans*

CryptoNet was constructed for the all protein coding genes of *C. neoformans* var. *grubii* H99 (serotype A) which lists 6,962 genes validated by deep coverage RNA-sequences<sup>14</sup>. We also added 13 validated mitochondria coding genes for further coverage (*C. neoformans* var. *grubii* H99 Sequencing Project, Broad Institute of Harvard and MIT, <http://www.broadinstitute.org>). As a result, a total of 6,975 protein coding genes were used for the construction of a *C. neoformans* functional network. For functional analysis of *C. neoformans* genes, we used Gene Ontology (GO) annotations for *Saccharomyces cerevisiae* orthologs, obtained from Saccharomyces Genome Database (SGD)<sup>15</sup>. Orthologous genes between two species are assigned by BLASTP bidirectional best hits.

### The gold standard co-functional gene links

Machine learning approaches for network construction requires gold standard linkage data. Pathway annotation databases are credible resources to collect them, yet current annotations for *C. neoformans* var. *grubii* (serotype A) are not sufficient. Therefore, we decided to use pathway annotations of *C. neoformans* var. *neoformans* (serotype D) because *C. neoformans* var. *neoformans* shares ~90% coding genome with *C. neoformans* var. *grubii*<sup>16</sup>. Pathway annotations by Kyoto Encyclopedia of Genes and Genomes (KEGG) were downloaded on August, 2013<sup>17</sup>, A total of 206,624 positive gold standard gene pairs were generated from 105 annotated KEGG pathways. To avoid network training bias toward a few dominant pathways, we excluded gene pairs derived from three over-dominant pathways<sup>18</sup>: metabolic pathways (cne:01100), biosynthesis of secondary metabolites (cne:01110), aminoacyl-tRNA biosynthesis (cne:00970). These three KEGG terms account for ~78 % of gold standard positive gene pairs. For orthology mapping between *C. neoformans* var. *grubii* and *C. neoformans* var. *neoformans*, we used an inparalog score threshold of 1 by Inparanoid (v4.1)<sup>19</sup>. The final gold standard set consists of 43,524 positive and 955,467 negative gene pairs among 1,414 *C. neoformans* genes.

### Benchmarking and integrating networks

The likelihood of co-functional link supported by given experimental or computational data was measured by Bayesian statistics approach<sup>20</sup>. Log likelihood score (LLS) was calculated by following equation:

$$LLS = \ln \left( \frac{P(L|E)/P(\neg L|E)}{P(L)/P(\neg L)} \right)$$

, where  $P(L|E)$  and  $P(\neg L|E)$  are probability of gold standard positive and negative link for given experimental data, respectively, and  $P(L)$  and  $P(\neg L)$  are probability of gold standard positive and negative link before the experimental data provided, respectively. To avoid overtraining, we calculate LLS with 0.632 bootstrapping as described in<sup>21</sup>.

For the links with multiple LLSs, we integrated the scores using weighted sum (WS) method as described in<sup>21</sup>:

$$WS = L_0 + \sum_{i=1}^n \frac{L_i}{D \cdot i}, \text{ for all } L \geq T,$$

, where  $L$  represents LLS ( $L_0$  is the maximum LLS of a given functional link), and  $i$  is the index number for all other LLS by ranked order.  $D$  is a free parameter used as a weight factor, and  $T$  is a minimum threshold of LLS.

### **Co-functional links inferred from co-citation of genes (CC)**

The original co-citation algorithm was based on an idea that functionally related two genes tend to be cited at the same research article abstract<sup>22</sup>. However, some articles have names of genes in the main text. To improve sensitivity of search, we scanned full text rather than just abstract for co-citation analysis. We searched PubMed Central (PMC, <http://www.ncbi.nlm.nih.gov/pmc/>) for articles containing “*Cryptococcus neoformans*” in abstract and any *C. neoformans* gene name in full text. As a result, we found a total of 609 articles containing *C. neoformans* gene names, and then assign probability of association between genes by Fisher’s exact test.

### **Co-functional links inferred from co-expression of genes (CX)**

We downloaded 12 microarray data sets containing no less than 8 samples of gene expression from Gene Express Omnibus (GEO)<sup>23</sup> on August, 2013. Pearson correlation coefficient was measured between all pairs of gene vectors of expression values to infer functional association between two genes. We tested a total of 12 microarray data sets and were able to infer functional links from seven of them: GSE31911 and 6 published data sets<sup>24-29</sup> including 191 samples (Table S8).

### **Co-functional links inferred from domain co-occurrence between proteins (DC)**

Domains recur functional regions of proteins. Because domains are functional subunits of proteins, proteins that share a similar set of domains may contribute to a similar function. Using profiles of domain occurrence for proteins by InterPro database<sup>30</sup>, we measure likelihood of functional association for given tendency of domain co-occurrence (DC) between two proteins. To learn a more informative co-occurrence pattern, we used a weighted version of the mutual information score, in which higher weights were given to rarer domains under the assumption that rarer domains harbor more specific pathway information.

### **Co-functional links inferred from genomic contexts (PG, GN)**

We used genomic context information of *C. neoformans* proteins to discover functional associations between genes with two different methods, phylogenetic profiles<sup>31-33</sup> and gene neighbors<sup>34-36</sup>. The similarity of phylogenetic profiles between two *C. neoformans* genes reflects the degree of co-inheritance of two genes during speciation, because functional constraints between functionally coupled genes mainly determine co-inheritance pattern. We first ran BLASTP to compare all *C. neoformans* protein sequences against all protein sequences from 1,626 Bacteria genomes, 122 Archaea genomes, and 396 Eukaryota genomes. Phylogenetic profile matrices of the blast hit scores were constructed, and the similarity between profiles was measured by mutual information scores as described in<sup>37</sup>. For *C. neoformans* genes, we found that the similarity of phylogenetic profiles for each of the two domains of life (Archaea and Bacteria) performed better than that for all 2,144 genomes in retrieving gold-standard functional links. Therefore, we integrated the two domain-specific

networks into a single network by phylogenetic profiles. For network inference by genomic neighborhood across 1,746 prokaryote genomes, we used two approaches to measure the genomic neighborhood: chromosomal distance between neighboring genes<sup>35,36,38</sup> and probability of observed neighborhood<sup>34</sup>. Because we previously found complementarity between these two methods<sup>39</sup>, we integrated them into a single network by genomic neighborhood.

### **Co-functional links by orthology-based transfer from yeast and human networks**

Associalogs are conserved functional associations transferred from different species by orthology<sup>21</sup>. We transferred conserved functional links between *C. neoformans* genes from YeastNet v3<sup>40</sup> and HumanNet<sup>41</sup>. All transferred co-functional associations are re-scored by Inparanoid weighted LLS (IWLLS)<sup>42</sup> as following,

$$\text{IWLLS (A'-B')} = \text{LLS (A-B)} + \ln(\text{inparalog score of A-A'}) + \ln(\text{inparalog score of B-B'})$$

, where A and B are *C. neoformans* genes and A' and B' are orthologous genes from *S. cerevisiae* or human, and the transferred functional association of A'-B' from that of A-B obtains weighted values as how likely A-A' and B-B' are orthologous by Inparanoid. We transferred 7 and 2 co-functional associations of YeastNet v.3 and HumanNet, respectively (summarized in **Table S1**).

### **Assessment of prediction power of networks for pathogenicity**

To assess predictive power of CryptoNet for *C. neoformans* pathogenicity, we used a total of 73 genes involved in three different virulence phenotypes were collected from literatures: 28 genes for capsule formation, 23 genes for melanin production, and 22 genes for thermotolerance. (**Table S2**). Predictions were performed for each of virulence phenotype. Ranks of virulence genes were assigned by sum of LLS by CryptoNet links from a gene to all other genes for the same virulence phenotype. If the known virulence genes are well interconnected by a given network, they are highly ranked by this network-assisted prioritizing method. The performance of network-assisted ranking was then assessed by the receiver operating characteristic (ROC) curve, which is usually summarized as a single score, area under the ROC curve (AUC). The ROC curve in general represents true positive (TP) rate for the given cost of false positive (FP) rate.

$$\frac{TP \text{ rate}}{FP \text{ rate}} = \frac{TP/TP + FN}{FP/FP + TN}$$

, where TP is a correctly predicted virulence gene, FP is an incorrectly predicted virulence gene, true negative (TN) is a correctly predicted non-virulence gene, and false negative (FN) is an incorrectly predicted non-virulence gene. AUC score ranges between 0.5 and 1, which indicate random prediction and perfect prediction, respectively. Visualization of networks for three virulence phenotypes were conducted by Cytoscape<sup>43</sup>.

### **Prediction of novel candidate genes for anti-fungal drug resistance**

To predict candidate genes for antifungal drug resistance, we devised a method of searching for context-associated hub genes. This method requires two components: subnetworks and an expression signature. Each subnetwork is composed of a hub gene having no less than 50

connected neighbors by CryptoNet and its neighbors. We predefined 2,135 subnetworks for the given number of neighbors as a threshold. An expression signature represents a cellular context such as drug stress condition. To construct an expression signature for antifungal drug stress, we collected 230 *C. neoformans* genes that were up-regulated by >2-fold upon treatment of fluconazole<sup>44</sup> (**Table S4**). Normalization of the expression data was conducted by Limma<sup>45</sup>. For the given pair of gene sets, one for 230 up-regulated genes by drug treatment and the other for neighbor genes of each of 2,135 hubs, we measured significance of enrichment using Fisher's exact test. If neighbors for a hub gene are significantly enriched among the up-regulated genes by fluconazole treatment, the corresponding hub gene is considered to be associated with the context of fluconazole treatment. We found 94 hub genes are significantly associated with gene expression response to fluconazole treatment ( $p$ -value < 0.05).

### **Construction of *ypk1Δ*, *sho1Δ* and *kin1Δ* mutants**

The genes were deleted with a disruption cassette containing split Nat<sup>r</sup> dominant selectable marker generated by double joint PCR as described before<sup>46</sup>. The gene disruption cassette was introduced into the H99S strain through the biolistic transformation method, as previously described<sup>47</sup>. The correct genotype of these mutants was confirmed by Southern blot analysis as described before<sup>48</sup>. Primers for this disruption and Southern blot analysis were described in **Table S9**.

### **Assay for virulence factor production, thermotolerance, and antifungal drug resistance**

The *C. neoformans* Madhani collection strains used in this study were provided by Fungal Genetics Stock Center. Before tests, we confirmed the correct genotype of each strain by diagnostic PCR to check potential cross-contamination during strain storage and recovery. Each strain was cultured in a liquid YPD (yeast extract-peptone-dextrose) medium for 16 hours at 30°C. The agar-based DME (Dulbecco's modified Eagle's) medium (Invitrogen, Carlsbad, CA) for capsule production, and agar-based Niger seed medium, which contains indicated concentration of glucose (0.1% and 0.5%), for melanin biosynthesis were prepared as previously described<sup>49</sup>. The capsule production of strains showing growth defect at 37°C were determined at 30°C. The relative capsule size of each cell was quantitatively measured, previously described<sup>49</sup>. Melanin production was monitored and photographed daily. For thermotolerance test, strains were incubated overnight at 30°C in a liquid YPD medium, washed, serially diluted (1 to 10<sup>4</sup> dilutions) with dH<sub>2</sub>O, and spotted onto a solid YPD medium. Each plate was incubated at 37°C or 39°C for 2-4 days and photographed for incubation period. For antifungal drug resistant test, each serially diluted strain (1 to 10<sup>4</sup> dilutions) was spotted onto a solid YPD medium containing the indicated concentration of azoles (fluconazole, itraconazole, and ketoconazole) or amphotericin B and incubated at 30°C and photographed for 2 to 5 days.

### ***Galleria mellonella* infection assay and *in vivo* mouse study**

*G. mellonella* in the final instar larval stage (15 larvae per strain) was infected through prolegs with 800,000 *Cryptococcus* cells in 4 μl of PBS by the Hamilton syringe. After injection, larvae were incubated at 30°C or 37°C for 14 days and then larvae showing signs, such as changes in body color and no movement in response to touch, were considered dead.

Larvae transforming into pupa were censored. The Kaplan-Meier survival curves were constructed by Prism 5.01 (GraphPad Software) and *p-values* were calculated from Gehan-Breslow-Wilcoxon test.

Four- to six-week-old female A/Jcr mice (National Cancer Institute, 18–20 g) were utilized in this study. For infection, strains were cultured in YPD medium overnight at 30°C, washed twice with phosphate buffered saline (PBS), and resuspended in PBS at  $2 \times 10^6$  cells per ml. Serially diluted cells were plated onto YPD medium and incubated at 24°C for 72 hr to determine viability and CFU. Ten mice per strain (except 9 mice for strain YSB1720 due to one death after pentobarbital treatment) were anesthetized with pentobarbital (Lundbeck Inc.) and infected via intranasal instillation with  $10^5$  cells (in 50  $\mu$ l). Survival was monitored twice daily, and moribund mice were CO<sub>2</sub>-euthanized. The Kaplan-Meier survival curves were generated with Prism 5.02 (GraphPad Software), and P values were evaluated from a Log-rank (Mantel-Cox) test.

### **Ethics statement**

The animal studies at Duke University Medical Center were in full compliance with the guidelines of the Duke University Medical Center Institutional Animal Care and Use Committee (IACUC) and the United States Animal Welfare Act (Public Law 98–198). The Duke University Medical Center IACUC approved all of the animal studies. The studies were conducted under protocol number A217-11-08 in Division of Laboratory Animal Resources (DLAR) facilities that are accredited by the Association for Assessment and Accreditation of Laboratory Animal Care (AAALAC).

## Supplementary References

- 1 Rundlett, S. E. *et al.* HDA1 and RPD3 are members of distinct yeast histone deacetylase complexes that regulate silencing and transcription. *Proc. Natl. Acad. Sci. U. S. A.* **93**, 14503-14508 (1996).
- 2 Pijnappel, W. W. *et al.* The *S. cerevisiae* SET3 complex includes two histone deacetylases, Hos2 and Hst1, and is a meiotic-specific repressor of the sporulation gene program. *Genes Dev.* **15**, 2991-3004 (2001).
- 3 Liu, O. W. *et al.* Systematic genetic analysis of virulence in the human fungal pathogen *Cryptococcus neoformans*. *Cell* **135**, 174-188 (2008).
- 4 Haynes, B. C. *et al.* Toward an integrated model of capsule regulation in *Cryptococcus neoformans*. *PLoS Pathog.* **7**, e1002411 (2011).
- 5 O'Meara, T. R., Hay, C., Price, M. S., Giles, S. & Alspaugh, J. A. *Cryptococcus neoformans* histone acetyltransferase Gcn5 regulates fungal adaptation to the host. *Eukaryot. Cell* **9**, 1193-1202 (2010).
- 6 Roelants, F. M., Breslow, D. K., Muir, A., Weissman, J. S. & Thorner, J. Protein kinase Ypk1 phosphorylates regulatory proteins Orm1 and Orm2 to control sphingolipid homeostasis in *Saccharomyces cerevisiae*. *Proc. Natl. Acad. Sci. U. S. A.* **108**, 19222-19227 (2011).
- 7 deHart, A. K., Schnell, J. D., Allen, D. A. & Hicke, L. The conserved Pkh-Ypk kinase cascade is required for endocytosis in yeast. *J. Cell Biol.* **156**, 241-248 (2002).
- 8 Lee, H., Khanal Lamichhane, A., Garraffo, H. M., Kwon-Chung, K. J. & Chang, Y. C. Involvement of PDK1, PKC and TOR signalling pathways in basal fluconazole tolerance in *Cryptococcus neoformans*. *Mol. Microbiol.* **84**, 130-146 (2012).
- 9 Chabrier-Rosello, Y. *et al.* *Cryptococcus neoformans* phosphoinositide-dependent kinase 1 (PDK1) ortholog is required for stress tolerance and survival in murine phagocytes. *Eukaryot. Cell* **12**, 12-22 (2013).
- 10 Balciunas, D. & Ronne, H. Three subunits of the RNA polymerase II mediator complex are involved in glucose repression. *Nucleic Acids Res.* **23**, 4421-4425 (1995).
- 11 Chang, Y. W., Howard, S. C., Budovskaya, Y. V., Rine, J. & Herman, P. K. The rye mutants identify a role for Ssn/Srb proteins of the RNA polymerase II holoenzyme during stationary phase entry in *Saccharomyces cerevisiae*. *Genetics* **157**, 17-26 (2001).
- 12 Chen, C., Pande, K., French, S. D., Tuch, B. B. & Noble, S. M. An iron homeostasis regulatory circuit with reciprocal roles in *Candida albicans* commensalism and pathogenesis. *Cell Host Microbe.* **10**, 118-135 (2011).
- 13 Chen, C. & Noble, S. M. Post-transcriptional regulation of the Sef1 transcription factor controls the virulence of *Candida albicans* in its mammalian host. *PLoS Pathog.* **8**, e1002956 (2012).



- 14 Janbon, G. *et al.* Analysis of the genome and transcriptome of *Cryptococcus neoformans* var. *grubii* reveals complex RNA expression and microevolution leading to virulence attenuation. *PLoS Genet.* **10**, e1004261 (2014).
- 15 Cherry, J. M. *et al.* *Saccharomyces* Genome Database: the genomics resource of budding yeast. *Nucleic Acids Res.* **40**, D700-705 (2012).
- 16 Kavanaugh, L. A., Fraser, J. A. & Dietrich, F. S. Recent evolution of the human pathogen *Cryptococcus neoformans* by intervarietal transfer of a 14-gene fragment. *Mol. Biol. Evol.* **23**, 1879-1890 (2006).
- 17 Kanehisa, M., Goto, S., Sato, Y., Furumichi, M. & Tanabe, M. KEGG for integration and interpretation of large-scale molecular data sets. *Nucleic Acids Res.* **40**, D109-114 (2012).
- 18 Lee, I., Li, Z. & Marcotte, E. M. An improved, bias-reduced probabilistic functional gene network of baker's yeast, *Saccharomyces cerevisiae*. *PLoS One* **2**, e988 (2007).
- 19 Ostlund, G. *et al.* InParanoid 7: new algorithms and tools for eukaryotic orthology analysis. *Nucleic Acids Res.* **38**, D196-203 (2010).
- 20 Lee, I., Date, S. V., Adai, A. T. & Marcotte, E. M. A probabilistic functional network of yeast genes. *Science* **306**, 1555-1558 (2004).
- 21 Lee, I. *et al.* A single gene network accurately predicts phenotypic effects of gene perturbation in *Caenorhabditis elegans*. *Nat. Genet.* **40**, 181-188 (2008).
- 22 Stapley, B. J. & Benoit, G. Biobibliometrics: information retrieval and visualization from co-occurrences of gene names in Medline abstracts. *Pac. Symp. Biocomput.*, 529-540 (2000).
- 23 Barrett, T. *et al.* NCBI GEO: archive for functional genomics data sets--update. *Nucleic Acids Res.* **41**, D991-995 (2013).
- 24 Kim, M. S. *et al.* Comparative transcriptome analysis of the CO<sub>2</sub> sensing pathway via differential expression of carbonic anhydrase in *Cryptococcus neoformans*. *Genetics* **185**, 1207-1219 (2010).
- 25 Chun, C. D., Liu, O. W. & Madhani, H. D. A link between virulence and homeostatic responses to hypoxia during infection by the human fungal pathogen *Cryptococcus neoformans*. *PLoS Pathog.* **3**, e22 (2007).
- 26 Lee, H. *et al.* Cobalt chloride, a hypoxia-mimicking agent, targets sterol synthesis in the pathogenic fungus *Cryptococcus neoformans*. *Mol. Microbiol.* **65**, 1018-1033 (2007).
- 27 Ko, Y. J. *et al.* Remodeling of global transcription patterns of *Cryptococcus neoformans* genes mediated by the stress-activated HOG signaling pathways. *Eukaryot. Cell* **8**, 1197-1217 (2009).
- 28 Janbon, G. *et al.* Characterizing the role of RNA silencing components in

- Cryptococcus neoformans*. *Fungal Genet. Biol.* **47**, 1070-1080 (2010).
- 29 Bang, S., Lee, D., Kim, H., Park, J. & Bahn, Y. S. Global transcriptome analysis of eukaryotic genes affected by gromwell extract. *J Sci Food Agric* **94**, 445-452 (2014).
  - 30 Hunter, S. *et al.* InterPro in 2011: new developments in the family and domain prediction database. *Nucleic Acids Res.* **40**, D306-312 (2012).
  - 31 Huynen, M., Snel, B., Lathe, W., 3rd & Bork, P. Predicting protein function by genomic context: quantitative evaluation and qualitative inferences. *Genome Res.* **10**, 1204-1210 (2000).
  - 32 Pellegrini, M., Marcotte, E. M., Thompson, M. J., Eisenberg, D. & Yeates, T. O. Assigning protein functions by comparative genome analysis: protein phylogenetic profiles. *Proc. Natl. Acad. Sci. U. S. A.* **96**, 4285-4288 (1999).
  - 33 Wolf, Y. I., Rogozin, I. B., Kondrashov, A. S. & Koonin, E. V. Genome alignment, evolution of prokaryotic genome organization, and prediction of gene function using genomic context. *Genome Res.* **11**, 356-372 (2001).
  - 34 Bowers, P. M. *et al.* Prolinks: a database of protein functional linkages derived from coevolution. *Genome Biol.* **5**, R35 (2004).
  - 35 Dandekar, T., Snel, B., Huynen, M. & Bork, P. Conservation of gene order: a fingerprint of proteins that physically interact. *Trends Biochem. Sci.* **23**, 324-328 (1998).
  - 36 Overbeek, R., Fonstein, M., D'Souza, M., Pusch, G. D. & Maltsev, N. The use of gene clusters to infer functional coupling. *Proc. Natl. Acad. Sci. U. S. A.* **96**, 2896-2901 (1999).
  - 37 Date, S. V. & Marcotte, E. M. Discovery of uncharacterized cellular systems by genome-wide analysis of functional linkages. *Nat. Biotechnol.* **21**, 1055-1062 (2003).
  - 38 Korbil, J. O., Jensen, L. J., von Mering, C. & Bork, P. Analysis of genomic context: prediction of functional associations from conserved bidirectionally transcribed gene pairs. *Nat. Biotechnol.* **22**, 911-917 (2004).
  - 39 Shin, J., Lee, T., Kim, H. & Lee, I. Complementarity between distance- and probability-based methods of gene neighbourhood identification for pathway reconstruction. *Mol. Biosyst.* **10**, 24-29 (2014).
  - 40 Kim, H. *et al.* YeastNet v3: a public database of data-specific and integrated functional gene networks for *Saccharomyces cerevisiae*. *Nucleic Acids Res.* **42**, D731-736 (2014).
  - 41 Lee, I., Blom, U. M., Wang, P. I., Shim, J. E. & Marcotte, E. M. Prioritizing candidate disease genes by network-based boosting of genome-wide association data. *Genome Res.* **21**, 1109-1121 (2011).
  - 42 Kim, E., Kim, H. & Lee, I. JiffyNet: a web-based instant protein network modeler for

- newly sequenced species. *Nucleic Acids Res.* **41**, W192-197 (2013).
- 43 Smoot, M. E., Ono, K., Ruscheinski, J., Wang, P. L. & Ideker, T. Cytoscape 2.8: new features for data integration and network visualization. *Bioinformatics* **27**, 431-432 (2011).
- 44 Florio, A. R. *et al.* Genome-wide expression profiling of the response to short-term exposure to fluconazole in *Cryptococcus neoformans* serotype A. *BMC Microbiol.* **11**, 97 (2011).
- 45 Smyth, G. K. in *Bioinformatics and Computational Biology Solutions using R and Bioconductor* 397-420 (Springer, New York, 2005).
- 46 Kim, M. S., Kim, S. Y., Yoon, J. K., Lee, Y. W. & Bahn, Y. S. An efficient gene-disruption method in *Cryptococcus neoformans* by double-joint PCR with NAT-split markers. *Biochem. Biophys. Res. Commun.* **390**, 983-988 (2009).
- 47 Davidson, R. C. *et al.* A PCR-based strategy to generate integrative targeting alleles with large regions of homology. *Microbiology* **148**, 2607-2615 (2002).
- 48 Jung, K. W., Kim, S. Y., Okagaki, L. H., Nielsen, K. & Bahn, Y. S. Ste50 adaptor protein governs sexual differentiation of *Cryptococcus neoformans* via the pheromone-response MAPK signaling pathway. *Fungal Genet. Biol.* **48**, 154-165 (2011).
- 49 Bahn, Y. S., Hicks, J. K., Giles, S. S., Cox, G. M. & Heitman, J. Adenylyl cyclase-associated protein Aca1 regulates virulence and differentiation of *Cryptococcus neoformans* via the cyclic AMP-protein kinase A cascade. *Eukaryot. Cell* **3**, 1476-1491 (2004).
